1 **The first draft genomes of the ant *Formica exsecta*, and its *Wolbachia***  
2 **endosymbiont reveal extensive gene transfer from endosymbiont to host**

3 Authors: Kishor Dhaygude<sup>1</sup>, Abhilash Nair<sup>1</sup>, Helena Johansson<sup>1</sup>, Yannick Wurm<sup>2</sup>,  
4 and Liselotte Sundström<sup>1,3</sup>

5 1) Organismal and Evolutionary Biology Research Programme, Faculty of Biological  
6 and environmental sciences P.O. Box 65, FI-00014 University of Helsinki, Finland

7 2) Organismal Biology Department, School of Biological and Chemical Sciences,  
8 Queen Mary University of London, Mile End Road, London E1 4NS, United  
9 Kingdom

10 3) Tvärminne Zoological Station, University of Helsinki, J.A. Palménin tie 260, FI-  
11 10900 Hanko, Finland

12 **Abstract:**

13 The wood ant *Formica exsecta* (Formicidae; Hymenoptera), is a common ant species  
14 throughout the Palearctic region. The species is a well established model for studies  
15 of ecological characteristics and evolutionary conflict. In this study, we sequenced  
16 and assembled draft genomes for *Formica exsecta* and its endosymbiont *Wolbachia*.  
17 The draft *F. exsecta* genome is 277.7 Mb long; we identify 13,767 protein coding  
18 genes for which we provide gene ontology, and protein domain annotations. This is  
19 also the first report of a *Wolbachia* genome from ants, and provides insights into the  
20 phylogenetic position of this endosymbiont. We also identified multiple horizontal  
21 gene transfer events (HGTs) from *Wolbachia* to *F. exsecta*. Some of these HGTs have  
22 also occurred in parallel in multiple other insect genomes, highlighting the extent of  
23 HGTs in eukaryotes. We expect that the *F. exsecta* genome will be valuable resource  
24 in further exploration of the molecular basis of the evolution of social organization.

25

26 **Key words:** *Formica exsecta*, genome, endosymbionts, transposons, horizontal gene  
27 transfer, *Wolbachia*

28

29 **Introduction**

30

31 Adapting to changes in the environment is the foundation of species survival, and is  
32 usually thought to be a gradual process. Genomic changes, such as single nucleotide  
33 substitutions play key roles in adaptive evolution, although few mutations are  
34 beneficial. Besides nucleotide substitutions, other structural and regulatory units, such  
35 as transposable elements (TEs) and epigenetic modifications, can also act as drivers in  
36 adaptation (González et al., 2010; Rostant, Wedell & Hosken, 2012; Casacuberta &  
37 González, 2013). Genetic material can also be acquired from other organisms by  
38 means of horizontal gene transfer (HGTs), and this can also lead to novel adaptive  
39 traits (Schönknecht, Weber & Lercher, 2014; Wybouw et al., 2016). Both mutations  
40 and HGTs can drive rapid genome evolution (Dunning Hotopp, 2011; Boto, 2014).  
41 Horizontal gene transfers have been reported in many taxa, most commonly from  
42 bacteria to eukaryotes (Dunning Hotopp, 2011), plants (Yue et al., 2012; Matveeva &  
43 Lutova, 2014), fungi (Rolland et al., 2009; Fitzpatrick, 2012; Bruto et al., 2014), but  
44 the underlying mechanisms that underpin horizontal gene transfer events, and mode  
45 by which bacterial genetic material is integrated into the eukaryote genome are not  
46 well understood.

47

48 Many cases of horizontal gene transfer from bacteria to eukaryotes involve  
49 intracellular endosymbionts, which are maternally transmitted through oocytes  
50 (Werren, 1997; Ferree et al., 2005). The most common examples of endosymbiont to  
51 host horizontal gene transfers involve the bacterium *Wolbachia*, a well described  
52 intracellular, maternally inherited gram-negative bacterium known to infect over 40%  
53 of the investigated insect species (Werren, 1997; Werren, Baldo & Clark, 2008).  
54 *Wolbachia* infection is also prevalent in filarial nematodes, crustaceans, and arachnids  
55 (Cordaux, Michel-Salzat & Bouchon, 2001; Fenn et al., 2006; Goodacre et al., 2006).  
56 *Wolbachia*- host interactions can be mutualistic or pathogenic (Moya et al., 2008). A  
57 number of ecdysozoan genomes have been reported to contain chromosomal  
58 insertions originating from *Wolbachia*, including the mosquito *Aedes aegypti*  
59 (Klasson et al., 2009a; Woolfit et al., 2009), the longhorn beetle *Monochamus*  
60 *alternatus* (Aikawa et al., 2009), filarial nematodes of the genera *Onchocerca*,  
61 *Brugia*, and *Dirofilaria* (Fenn et al., 2006; Hotopp et al., 2007), parasitoid wasps of  
62 the genus *Nasonia*, the fruit fly *Drosophila ananassae*, the pea aphid *Acythosiphon*  
63 *pisum* (Nikoh & Nakabachi, 2009; Nikoh et al., 2010), and the bean  
64 beetle *Callosobruchus chinensis* (Kondo et al., 2002). Although most of the

65 transferred DNA is probably nonfunctional in the host genome (Kondo et al., 2002;  
66 Hotopp et al., 2007; Nikoh et al., 2008), some of the transferred genes are functional  
67 (Klasson et al., 2009a). These genes are expressed in specific tissues, are subject to  
68 purifying selection, and are involved in processes such as protein synthesis inhibition,  
69 membrane transport and metabolism (Hotopp et al., 2007; Woolfit et al., 2009;  
70 McNulty et al., 2013).

71

72 Infection with *Wolbachia* is widespread in Hymenoptera. Most hymenopteran  
73 *Wolbachia* infections have the cytoplasmic incompatibility phenotype (Werren &  
74 Windsor, 2000), which leads to reproductive incompatibility between infected sperm  
75 and uninfected eggs. Wenseleers et al. (1998) showed that 25 out of 50 species of ants  
76 in Java and Sumatra screened positive for one strain of *Wolbachia*. By contrast, a  
77 study on a single Swiss population of the ant *Formica exsecta*, found that all the ants  
78 tested were infected with four or five different strains of *Wolbachia* (Keller et al.,  
79 2001; Reuter & Keller, 2003).

80

81 The aims of this study are to test whether horizontally transferred genetic elements  
82 exist in the genome of the ant *Formica exsecta*, and to describe the genomic  
83 organization of any such elements. The genus *Formica* is listed by the Global Ant  
84 Genome Alliance (GAGA) as one of the high-priority ant taxons to be sequenced  
85 (Boomsma et al., 2017; <http://antgenomics.dk/>), owing to its key taxonomic position,  
86 and the ecological and behavioral data that are available for the species. To date, no  
87 genome sequence is available for this genus.

88

89 Our study population of *F. exsecta*, located on the Hanko peninsula, Southwestern  
90 Finland, has been monitored since 1994, and data on demography, genetic structure,  
91 and ecology are available (Sundström, Chapuisat & Keller, 1996; Sundström, Keller  
92 & Chapuisat, 2003; Haag-Liautard et al., 2009; Vitikainen, Haag-Liautard &  
93 Sundström, 2015). Based on genetic data on colony kin structure most (97%) of the  
94 approximately 200 colonies are known to have a single reproductive queen, mated to  
95 one or more (usually two) males (Sundström, Chapuisat & Keller, 1996; Sundström,  
96 Keller & Chapuisat, 2003; Haag-Liautard et al., 2009; Vitikainen, Haag-Liautard &  
97 Sundström, 2015). We report the whole genome sequencing of this species, and the  
98 draft genome sequence of its associated cytoplasmic *Wolbachia* endosymbiont

99 (wFex). We further report the presence of multiple extensive insertions of *Wolbachia*  
100 genetic material in the host genome, and compare the HGTs insertions discovered in  
101 the assembled draft genome to other genomes, to understand the pattern of HGT  
102 events between endosymbiont and host. We analyze in detail the genomic features of  
103 *F. exsecta* along with its endosymbiont *Wolbachia*, and discuss our findings in the  
104 light of genome evolution in *Wolbachia* and its host.

105

## 106 **Materials and Methods**

107

### 108 **Sample collection and genome sequencing.**

109 We selected one single-queen colony from our study population on the island  
110 Furuskär (F162), and collected 200 adult males from this colony. We used males  
111 because in Hymenoptera these arise through arrhenotoky (Normark, 2003) and are  
112 haploid (Crozier, 1975), meaning that a pool of males together are representative of  
113 the diploid genome of their mother. DNA extraction was done from testis, which  
114 contains sperm cells and organ tissue, to avoid contamination by gut microbiota. We  
115 used a Qiagen Genomic-tip 20/G extraction kit according to the manufacturer's  
116 protocol. For Illumina sequencing we constructed three small insert paired-end  
117 libraries (insert sizes of 200 bp, 500 bp, 800 bp), and four mate pair (large insert  
118 paired-end) libraries (insert sizes of 2 kb, 5 kb, 10 kb and 20 kb), each containing  
119 DNA from 15-50 pooled males. Libraries were prepared using protocols  
120 recommended by the manufacturers. Sequencing was done at the Beijing Genomics  
121 Institute (BGI) using HiSeq2000, which produced a total of 99.97 GB of raw data  
122 (Table 1).

123

### 124 **Genome assembly**

125 We assembled the *F. exsecta* genome using SOAPdenovo2 version 2.04 (Xie et al.,  
126 2014) in three main steps. First, a de Bruijn graph was constructed using short length  
127 insert library reads with default parameters (k-mer value of 45), to construct the  
128 contigs. The initial contig assembly contained 104,190 contigs with an N50 size of  
129 22,328 bp, and total length of 276.23 Mb of sequence, at an average depth of  
130 coverage of 47.37X. Second, all individual reads were realigned onto the contigs.  
131 Because reads are paired, they can aid with scaffolding: The number of reads  
132 supporting the adjacency of each pair of contigs was calculated and weighted by the

133 ratio between consistent and conflicting paired ends. Scaffolds were constructed in a  
134 stepwise manner using libraries of increasing sizes from 500bp insert size paired-end  
135 reads up to mate-pair of 5 kb insert size. 80,473 contigs could not be placed in  
136 scaffolds. These are highly similar repetitive sequences, since the cd-hit-est tool  
137 (Huang et al., 2010) showed that 43% of these contigs clustered together at 80% of  
138 the sequence length. Third, sequencing gaps in the scaffolds were closed with the two  
139 mate-pair libraries (Insert size 10 kb and 20 kb). Overall, these steps produced an  
140 initial assembly with an N50 scaffold length of 949,634 bp, and a total length of  
141 289,843,734 bp with each scaffold longer than 200 bp.

142  
143 We used blobology v1.0 (Kumar et al., 2013) to generate taxon-annotated GC-  
144 coverage (TAGC) plots of scaffolds in the genome assembly, which can help to  
145 identify bacterial contamination (Supplementary Figure S1). The scaffolds for the  
146 TAGC plot were successfully annotated to the taxonomic order based on the best blast  
147 match to the NCBI nt database (O’Leary et al., 2016). This analysis revealed that 74  
148 scaffolds matched the endosymbiotic bacterium *Wolbachia*. Sixty-nine of these  
149 scaffolds were removed as we concluded that they are part of the *Wolbachia* genome  
150 (see analysis below), but five contigs were retained in the final assembly for *F.*  
151 *exsecta* as they contained both *Wolbachia* and ant sequences. Following this curation,  
152 the final draft genome assembly was 277.7 Mb long with an N50 value of 997,654 bp  
153 and 36% Guanine-cytosine (GC) content (Table 2).

154

### 155 **Genome assembly of *Wolbachia***

156 All 25 published *Wolbachia* genomes were obtained from the NCBI database  
157 (O’Leary et al., 2016). We aligned the 74 scaffolds from the initial *F. exsecta*  
158 assembly that matched with *Wolbachia* against these genomes using MUMmer 3.23  
159 (Kurtz et al., 2004), and inspected the alignments manually. Sixty-nine of the 74  
160 scaffolds matched completely to *Wolbachia* genomic regions. These 69 scaffolds  
161 represented 3.09 Mb total, with a N50 value of 104,167 bp, henceforth we refer to this  
162 group of scaffolds as “the *Wolbachia* endosymbiont genome of *F. exsecta*” (wFex).

163

164 The remaining five scaffolds each contained several interspersed fragments with  
165 similarity to *Wolbachia* genomes, whereas other parts of these scaffolds had high  
166 similarity to genomes of ants. Furthermore, the sequencing coverage of these

167 scaffolds was similar to the *F. exsecta* scaffolds, rather than to the *Wolbachia*  
168 scaffolds. Finally, detailed inspection of these scaffolds in a genome browser showed  
169 no change in sequencing depth where we identify the interspersed fragments with  
170 similarity to *Wolbachia*, which would be expected for erroneous chimeric assembly  
171 (Lasken & Stockwell, 2007). These data thus suggest that fragments of *Wolbachia*  
172 were horizontally transferred to the *F. exsecta* genome. To corroborate these results  
173 with independent approaches, we re-assembled the raw sequencing data with two  
174 additional independent algorithms that we expect would make different types of  
175 assembly errors than SOAPdenovo. The first software, Velvet version 1.2.09 (Zerbino  
176 & Birney, 2008), is also based on a de Bruijn graph; the second, SGA version 0.10.5  
177 (Simpson & Durbin, 2012) is based on a string graph. Both resulting assemblies  
178 confirmed the patterns we had seen, and validate the idea that the five SOAPdenovo  
179 scaffolds containing sequence with similarity to both ants, and *Wolbachia* represent  
180 horizontal gene transfers from *Wolbachia* to *F. exsecta*.

181

182 We further compared the sequences of the horizontally transferred fragments in the  
183 five SOAPdenovo scaffolds against the NCBI (nr/nt) database (O'Leary et al., 2016),  
184 using blast 2.2.27 (Altschul et al., 1990) to determine whether these fragments may  
185 have also undergone horizontal gene transfer in other arthropod genomes. We  
186 performed analogous searches on ant genomes present in the NCBI, and the  
187 Fourmidable databases (Wurm et al., 2009). When a positive match with any other ant  
188 or arthropod genomes was found, the exact location of the insertion was determined,  
189 and compared with that of *F. exsecta*. Finally, the five scaffolds were also compared  
190 to the *F. exsecta* transcriptome (Dhaygude et al., 2017), using blastn 2.2.27, to assess  
191 similarity with expressed sequences.

192

### 193 **Quantitative assessment of genome assemblies**

194 The quality of the genome assembly is crucial, as it defines the quality of all  
195 subsequent analyses that are based on the genome sequences. We explored multiple  
196 assembly options (data not shown), and used two methods to assess assembly quality  
197 and robustness in order to select the highest quality assembly. First, we evaluated  
198 genome contiguity (number and length of contigs) using Quast 3.2 (Gurevich et al.,  
199 2013) to assess whether our newly assembled draft genome is comparable to  
200 published ant genomes (Favreau et al., 2018) based on assembly statistics (N50,N90).

201 Second, we used core gene content-based quality assessment using CEGMA 2.4  
202 (Parra et al., 2007) to ascertain that the 248 most highly conserved eukaryotic proteins  
203 are present in our genome assembly. We also compared genes present in our genome  
204 assembly to single-copy orthologs across four lineage-specific sets (Eukaryota (303  
205 genes), Insecta (1,658 genes), Arthropoda (2,675 genes), and Hymenoptera (4,415  
206 genes)) using the BUSCO 1.1 (Simão et al., 2015). In addition, we compared the *F.*  
207 *exsecta* genome with 13 other ant genomes, *Camponotus floridanus*, *Atta cephalotes*,  
208 *Acromyrmex echinator*, *Cardiocondyla obscurior*, *Cerapachys biroi*, *Lasius niger*,  
209 *Linepithema humile*, *Monomorium pharaonis*, *Pogonomyrmex barbatus*, *Vollenhovia*  
210 *emeryi*, *Wasmannia auropunctata*, *Harpegnathos saltator*, and *Solenopsis invicta*  
211 (Wurm et al., 2009), using BUSCO. We report BUSCO quality metrics for the *F.*  
212 *exsecta* genome. (Table 3).

213

214 The quality of the *Wolbachia* endosymbiont genome was quantified with a similar  
215 approach, where we used BUSCO to examine the presence of Universal Single-Copy  
216 Orthologs of the Bacteria (148 genes), and the Proteobacteria (221 genes) lineages  
217 (Table 3). We also used BUSCO to compare the wFex genome with four other  
218 *Wolbachia* genomes, including the *Wolbachia* endosymbionts of *Drosophila simulans*  
219 (*wRi*), *Culex quinquefasciatus* (*wPip*), *Drosophila melanogaster* (*wMel*), and  
220 *Drosophila simulans* (*wNo*).

221

## 222 **Gene prediction**

223 We combined several publicly available data sets and computational gene prediction  
224 tools to establish an Official Gene Set (OGS) for the *F. exsecta* genome. First, we  
225 used the MAKER version 2.28 pipeline (Cantarel et al., 2008; Holt & Yandell, 2011),  
226 to derive consensus gene models from Augustus version 3.1.0 (Stanke &  
227 Morgenstern, 2005), SNAP version 2016-07-28 (Korf, 2004), and Exonerate version  
228 2.2.0 (Slater & Birney, 2005). For this MAKER prediction we used as input datasets  
229 the *F. exsecta* transcriptome (ESTs) (Bioproject ID: PRJNA213662, (Dhaygude et al.,  
230 2017)), and the proteomes of all available ant species (Uniprot download on 20-04-  
231 2015). The longest protein at each genomic locus was retained, resulting in a set of  
232 23,517 gene models. Because samples may have different sets of transcripts, owing to  
233 different biological conditions or developmental stages (Dhaygude et al., 2017), we  
234 additionally made a separate transcript-spliced assembly using RNA sequences

235 generated from separate libraries for different life stages (Dhaygude et al., 2017),  
236 using the Tophat version 2.1.0 (Trapnell, Pachter & Salzberg, 2009), and Cufflinks  
237 version 2.2.1 (Trapnell et al., 2010). The assemblies from the different samples were  
238 then merged using cuffmerge (Trapnell et al., 2010). We further obtained separate  
239 Augustus version 3.1.0 (Stanke & Morgenstern, 2005), and Glimmer version 3.02  
240 (Salzberg et al., 1998) gene models with default settings (Augustus: --species=fly --  
241 genemodel=partial, --strand=both, Glimmer: +f, +s, -g 60). The gene sets and gene  
242 models from MAKER and from other programs were then merged. Redundancy was  
243 removed by favoring for each transcript the longest prediction starting with a  
244 methionine. If several transcripts had the same length we retained the one which had  
245 the best support from the cufflinks transcript assembly. This redundancy removal  
246 resulted in a final set of 13,637 protein coding gene models (final OGS), which  
247 contained 33,121 transcripts.

248

#### 249 **Genome Annotation**

250 We analyzed the complete official gene sets (OGS) of *F. exsecta* to identify sequence  
251 and functional similarity by comparing with different sequence databases using blast.  
252 By using a ribosomal database, we were able to annotate both the large (LSU), and  
253 the small (SSU) subunit ribosomal RNAs. The remaining gene sequences were used  
254 for retrieving functional information from other databases (SwissProt, Pfam,  
255 PROSITE, and COG). Gene sequences were considered to be coding if they had a  
256 strong unique hit to the SwissProt protein database (Magrane & Consortium, 2011;  
257 The Uniprot Consortium, 2017), or appeared to be orthologs of known predicted  
258 protein-coding genes from ant species based on TrEMBL (Translation of EMBL  
259 nucleotide sequence database). We also assigned putative metabolic pathways,  
260 functional classes, enzyme classes, GeneOntology terms, and locus names with the  
261 AutoFact tool (Koski et al., 2005). To further improve annotation, and for assigning  
262 biological function (e.g. gene expression, metabolic pathways), we also did  
263 orthologous searches by comparing with other Hymenoptera sequences (Wurm et al.,  
264 2009). To quantify variation in the numbers of protein family members, we performed  
265 Pfam (version 24.0) (Bateman et al., 2004) and PROSITE profile (Sigrist et al., 2010)  
266 analyses on proteins obtained from the *F. exsecta* gene set. Our final annotation  
267 included gene sequences with retrieved protein-related names, functional domains,  
268 and expression in other organisms along with enzyme commission (EC) numbers,



269 pathway information, Cluster of Orthologous Groups (COG), functional classes, and  
270 Gene Ontology terms.

271

## 272 **Orthology and evolutionary rates**

273 Comparative genome-wide analysis of orthologous genes was performed with  
274 OrthoVenn (Wang et al., 2015) to compare the predicted *F. exsecta* protein sequences  
275 with those of four other ant species, *Camponotus floridanus*, *Lasius niger*, *Solenopsis*  
276 *invicta*, and *Cerapachys biroi*, all of which were downloaded from their respective  
277 public NCBI repositories. The predicted proteins of *F. exsecta* and the other four  
278 species were uploaded into the OrthoVenn web server for identification and  
279 comparison of orthologous clusters (Wang et al., 2015). Following clustering,  
280 orthAgoque was used for the identification of putative orthology and inparalogy  
281 relationships. To deduce the putative function of each ortholog, the first protein  
282 sequence from each cluster was searched against the non-redundant protein database  
283 UniProt using blastp 2.2.27. Pairwise sequence similarities among protein sequences  
284 were determined for all species with a blastp 2.2.27 (E-value cut-off of  $10^{-5}$ , and an  
285 inflation value of 1.5 for MCL). Finally, an interactive Venn diagram, summary  
286 counts, and functional summaries of clusters shared between species were visualized  
287 using OrthoVenn.

288

289 To identify genes under positive or relaxed purifying selection in *F. exsecta*, we  
290 estimated the rates of non-synonymous to synonymous changes for core orthologous  
291 genes (3,156) from five ant species (*F. exsecta*, *Camponotus floridanus*, *Lasius niger*,  
292 *Solenopsis invicta*, and *Cerapachys biroi*). For this we only included orthologous  
293 groups with one ortholog for each species (no paralogous genes were included) in the  
294 analysis. We extracted coding and protein sequences for 3,156 orthologous groups  
295 from the respective public NCBI repositories for the species included. We then  
296 aligned all protein sequences using Clustal Omega (Sievers & Higgins, 2014), and  
297 then converted them to nucleotide sequences with PAL2NAL version 14 (Yang,  
298 1997). We then ran CODEML version 4.9e (Yang, 1997), using the branch site model  
299 with *F. exsecta* as foreground branch, and the other five ant species as background  
300 lineages. The Bayes empirical method (Yang et al. 2005) was used to estimate the  
301 posterior probabilities, which were then used to identify sites under selection. We

302 additionally estimated pairwise dN/dS ratios for orthologous genes (5,148 genes)  
303 between *Camponotus floridanus* and *F. exsecta* in CODEML.

304

305 We also ran an orthology analysis between the proteins from three *Wolbachia* species  
306 published previously (wRi, wDac, wNo; (Klasson et al., 2009b; Ellegaard et al., 2013;  
307 Ramirez-Puebla et al., 2016)), to find similarity with the predicted protein sets of the  
308 newly assembled wFex genome. Orthologs were identified using OrthoVenn (E-value  
309 cut-off of  $10^{-5}$  and inflation value 1.5). In addition, we analyzed the paralogous genes  
310 within the wFex genome, to help understand the increased genome size in comparison  
311 to other *Wolbachia* genomes.

312

### 313 **Discovery and annotation of transposable elements**

314 We used RepeatMasker version 4.0.7 (Smit. et al., 2015), and the TransposonPSI  
315 version 08-22-2010 (Brian J. Haas, 2011) to detect repetitive elements in the genome.  
316 To retrieve and mask repetitive elements, we downloaded files from the Repbase and  
317 Dfam databases, and aligned each of them with the *F. exsecta* genome sequences as  
318 query sequences. Positive alignments were regarded as repetitive regions and  
319 extracted for further analysis. To identify genome sequence region homology to  
320 proteins encoded by different families of transposable elements, we used the  
321 TransposonPSI analysis tool. This tool uses PSI-blast, with a collection of retro-  
322 transposon ORF homology profiles to identify statistically significant alignments.

323

### 324 ***Wolbachia* phylogeny**

325 We analysed the phylogeny of *Wolbachia* in MrBayes v3.2.6 x64 (Ronquist &  
326 Huelsenbeck, 2003), using a concatenated sequences of 35 genes. For this analysis,  
327 each gene was considered as a different partition, and the most fitting nucleotide  
328 substitution model was chosen for each gene, using the bayesian information criterion  
329 (BIC) in the program jMODELTEST (Posada, 2008). The partitioned dataset was run  
330 for 200,000 generations, sampling at every 100th generation with each partition  
331 unlinked for the substitution parameters. Convergence of the runs was confirmed by  
332 checking that the potential scale reduction factor was  $\sim 1.0$  for all model parameters,  
333 and by ensuring that an average split frequency of standard deviations  $< 0.01$  was  
334 reached (Ronquist & Huelsenbeck, 2003). The first 25% of the trees were discarded  
335 as burn-in, and the remaining trees were used to create a 50% majority-rule consensus

336 tree, and to estimate the posterior probabilities. To check for consistency of the  
337 phylogeny, Markov chain Monte Carlo (MCMC) runs were repeated to get a similar  
338 50% majority-rule consensus tree with high posterior probabilities. The phylogenetic  
339 tree generated was visualized using Figtree v1.4.2 (Rambaut, 2012).

340

## 341 **Results & Discussion**

### 342 **Assembly of the *Formica exsecta* genome**

343 We created Illumina sequencing libraries from DNA extracted from testes of males of  
344 a *F. exsecta* colony to obtain >99 gigabases of Illumina sequence data. The final *F.*  
345 *exsecta* genome resulting from assembly of this data was 277.7 megabases (Mb) long,  
346 encompassing 14,617 scaffolds (Figure 1) with a N50 scaffold length of 997.7 kb  
347 (Table 2). The number of scaffolds is higher than the number of chromosomes  
348 reported for *F. exsecta* (n=26; Agosti & Hauschteck-Jungen, 1987; Rosengren,  
349 Rosengren & Söderlund, 2009). Similarly, the *F. exsecta* genome assembly is  
350 somewhat shorter than genome size estimates obtained by flow cytometry for species  
351 in the subfamily Formicinae (range: 296-385 Mb; Tsutsui et al., 2008). These  
352 discrepancies are unsurprising given the difficulty of assembling highly repetitive  
353 gene content from short sequencing reads (Henson, Tischler & Ning, 2012). In line  
354 with this, the genome assembly length metrics are similar to those of the 23 ant  
355 genomes that have been published. The raw data, gapped scaffolds, and annotations  
356 underpinning this assembly are deposited into public databases under BioProject  
357 PRJNA393850 (accession NPMM00000000).

358

### 359 **Quantitative assessment of genome assembly**

360 Based on scaffold N50 and N75 statistics, contig size, and GC content, the *F. exsecta*  
361 genome assembly is comparable in quality and completeness to other sequenced ant  
362 genomes (Supplementary Table S1). All the 248 CEGMA eukaryotic core genes were  
363 found, and 241 of these genes were complete in length. Similarly, 98.5% of 1634  
364 BUSCO Insecta genes were complete in the genome (Table 3). These results held  
365 with other BUSCO analysis levels including Eukaryota, Arthropoda, and  
366 Hymenoptera, with low duplication levels (2.2% to 5.3%), and few missing genes  
367 (0.6% to 1.27%; all details in Table 3). Such discrepancies can be due to technical  
368 artifacts such as sequencing biases or assembly difficulties, as well as to true  
369 differences between our *F. exsecta* sample and the BUSCO and CEGMA datasets. To

370 further evaluate genome completeness, we compared the independently generated *F.*  
371 *exsecta* transcriptome (Dhaygude et al., 2017) to the genome reported here. More than  
372 98.75 % of the 10,999 assembled ESTs mapped unambiguously to the genome (blastn  
373  $E < 10^{-50}$ ). Together, these analyses show that the genome assembly has high  
374 completeness.

375

### 376 **Gene Content in the *Formica exsecta* genome**

377 We identified 13,637 protein coding genes by combining *ab initio*, EST-based, and  
378 sequence similarity based gene predictions methods. The GC content was higher in  
379 exons (41.6%) than in introns (30.6%), a pattern similar to that reported in the honey  
380 bee, *Apis mellifera*, and the fire ant, *Solenopsis invicta* (Weinstock et al., 2006; Wurm  
381 et al., 2011). Despite this, as in other ant genomes (Schrader et al., 2014; Boomsma et  
382 al., 2017), overall GC content in genes (35.1%) was similar to the rest of the genome  
383 (36.0%).

384 We used blast and orthology analyses to characterize *F. exsecta* genes. The vast  
385 majority (88%; 12,050) of these had the highest blastp similarity to genes in other  
386 ants. A further 0.4% had the highest similarity to Apidae, and 0.6% to Braconidae,  
387 Amniota, and *Wolbachia* (the latter probably due to HGT; see below and Figure 2).  
388 The remaining 3.09% belong to other taxa not included in Figure 2 because they had  
389 fewer than 20 hits. The remaining genes (7.91%,  $n = 1,080$ ) lacked clear sequence  
390 similarity [cutoff for blastx  $E < 10^{-3}$ ] to known protein sequences or protein domains.  
391 Some of these may represent erroneous gene predictions (Drăgan et al., 2016),  
392 however 994 of them are  $\geq 1000$  bp and include an open reading frame  $> 300$  amino  
393 acids long, which is unlikely to occur by chance. Importantly, although only a single  
394 pooled transcriptome library, prepared from different developmental life stage  
395 samples, was available for *F. exsecta*, 235 of the genes are expressed (FPKM  $\geq 1$ ;  
396 Dhaygude et al., 2017). It is thus likely that a high proportion of the 1,080 genes are  
397 taxonomically restricted genes unique to the *F. exsecta* lineage.

398 The total genes of *F. exsecta* ( $n = 13,637$ ) were grouped into 7,727 orthologous clusters  
399 (Figure 3). Comparative analysis of the *F. exsecta* genes with the closely related  
400 species *C. floridanus* and *L. niger*, and the more distantly related *S. invicta* and *C.*  
401 *biroi* revealed, that 4,685 orthologous clusters out of 7,727 are shared between all five

402 species. In addition, we found 102 gene clusters that were exclusive to three  
403 Formicinae genomes (*F. exsecta*, *C. floridanus* and *L. niger*; Supplementary Table  
404 S2). Such genes are important candidates that could be involved in the evolution of  
405 this subfamily. Many of the genes in these clusters had no detectable relation to  
406 existing genes outside the Formicinae; those that did included GO annotations such as  
407 glycerate kinase, transferase activity, deoxyribonucleoside diphosphate metabolic  
408 process.

409 Interestingly, 633 of the *F. exsecta*-specific genes could be grouped into 197 ortholog  
410 clusters of 2 or more genes (Supplementary Table S3), suggesting not only newly  
411 evolved genes, but also potential gene duplication and subfunctionalisation. Previous  
412 comparative genome studies have indicated that 10-20% of genes lack recognizable  
413 homologs in other species in every taxonomic group so far studied (Wilson et al.,  
414 2007; Khalturin et al., 2009; Johnson & Tsutsui, 2011; Tautz & Domazet-Lošo,  
415 2011). Our lower percentage of orphan genes could be due to our hierarchical  
416 approach to annotation, the wide range of databases used, and the large amounts of  
417 ant genomic data generated over the past years (Favreau et al., 2018).

#### 418 **Genes with signatures of evolution under positive selection**

419 We performed analyses to detect genes with signatures of positive selection in *F.*  
420 *exsecta*. First, selection analysis (dN/dS ratio estimations) on 3,157 single-copy genes  
421 shared between the five core ant species (without paralogous genes), revealed that 500  
422 genes have signatures of positive selection in the lineage leading to *F. exsecta*. These  
423 include genes involved in fatty acid metabolism, lipid catabolism, and chitin  
424 metabolism (Supplementary Table S4). Interestingly, previous studies on ants, bees,  
425 and flies also provide evidence for positive selection on genes in similar functional  
426 categories as in our study (Roux et al., 2014). For example, genes involved in  
427 biological functions such as carbohydrate metabolic processes, lipid metabolic  
428 processes, cytoskeleton organization, cell surface receptor signaling pathways, and  
429 RNA processing were overrepresented in the enrichment analysis, and such genes  
430 were also previously reported as positively selected genes in ants, bees, and flies  
431 (Viljakainen et al., 2009; Roux et al., 2014).

432

433 To perform a similar analysis on a larger number of genes, we used a second  
434 approach based on pairwise comparisons between *F. exsecta* and *C. floridanus*. Out of  
435 5,148 one-to-one- orthologs, 29 showed  $dN/dS > 1$  ( $P < 0.005$ ; Supplementary Table  
436 S5). Although some of these putative genes could be artefactual or non-coding, they  
437 all include an open reading frame of  $> 100$  amino acids. Five (17%) out of 29 genes  
438 are likely linked to transposon activity as they are transposase-like or have EpsG  
439 domains. Among the other genes, only a few are annotated: the Icarapin-like protein  
440 is a venom gene, and such genes have been shown to be under positive selection in  
441 wasps (Werren et al., 2010). Perhaps more surprisingly we found high  $dN/dS$  for the  
442 Homeobox protein gene *orthopedia* which is involved in early embryonic  
443 development (Mackenzie et al., 1991).

444

#### 445 **Repetitive elements**

446 Repetitive elements comprised 15.88% (44.10 Mb) of the *F. exsecta* assembly. This  
447 proportion is similar to that found in other ants (16.5-31.5% (Schrader et al., 2014).  
448 This is probably an underestimate because (i) genomic regions that cannot be  
449 assembled are enriched with such repeats, (ii) multiple copies of a repetitive element  
450 are often collapsed into a single copy during genome assembly, and (iii) only a  
451 portion of repetitive elements in *F. exsecta* will have similarity to sequences in  
452 standard repeat databases. Overall, 3.18% (8.8 Mb) of the assembly was composed of  
453 simple repeats, whereas 12.73% (35.34 Mb) comprised interspersed repeats, most of  
454 which (53.73%) could not be classified. Among those that could be classified, 10,542  
455 retro element fragments represented 2.74% of the genome, and 53,438 DNA  
456 transposons represented 4.23% of the genome. The *F. exsecta* genome contains copies  
457 of the piggyBac transposon (23 in total, and 7 within intact ORFs). Higher numbers  
458 (234) of piggyBac transposons have been found in *C. floridanus*, yet only 6 of these  
459 were found within ORFs (Bonasio et al., 2010).

460

#### 461 **The *Wolbachia* endosymbiont genome of *Formica exsecta***

462 The assembly of the *Wolbachia* endosymbiont, wFex, was 3.09 Mb long,  
463 encompassing 69 scaffolds with a N50 scaffold length of 104,167 nt, and a GC  
464 content of 35.13% (Table 2; GenBank: RCIU00000000, Bioproject: PRJNA436771).  
465 This assembly of wFex shows extensive nucleotide similarity with the complete  
466 genome of the *Wolbachia* endosymbiont of *Drosophila simulans*, wNo (GenBank ID:

467 NC\_021084), and covers approximately 84% of its length (Supplementary Figure S2).  
468 We determined that 549 genes are present as a single copy in the *Wolbachia* genomes  
469 most closely related to wFex ((Lindsey et al., 2016) see below); 537 (99.6%) out of  
470 these 539 core genes are present in the wFex genome, suggesting high completeness.

471  
472 However, the wFex genome is considerably larger (3.09 Mb) than the *Wolbachia*  
473 genomes reported previously (range: 0.95 to 1.66 Mb; Sun et al., 2001), and includes  
474 a greater number of open reading frames (1,796 ORFs) than other published  
475 *Wolbachia* genomes [range: 644 to 1,275 genes]. *Formica exsecta* is known to harbor  
476 more than one *Wolbachia* strain (Reuter & Keller, 2003), thus these patterns could be  
477 due to the presence of multiple endosymbiont strains. Two additional lines of  
478 evidence support this idea. First, 212 genes (11.80 %), that are present as single-copy  
479 genes in the wMel, wRi and wDac genomes (Klasson et al., 2009b; Ellegaard et al.,  
480 2013; Ramirez-Puebla et al., 2016), are duplicated in our assembly (Supplementary  
481 Table S6). Furthermore, 92 (12%) of the 775 genes present as a single copy in wFex,  
482 included genetic variation within our sample, including in the cytochrome oxidase  
483 subunit I; no such variation is normally expected. Despite extensive attempts, we  
484 were unable to disentangle the two or more *Wolbachia* strains – this is likely because  
485 differences in synteny between the strains cannot be resolved using short-read  
486 sequence data. Similar assembly artifacts, due to multiple *Wolbachia* strains, have  
487 also been reported by other studies (Ramírez-Puebla et al., 2016).

488  
489 To determine how wFex is related to other *Wolbachia*, we used Bayesian  
490 phylogenetic analysis based on 35 conserved genes (Supplementary Table S7) from  
491 the 25 available *Wolbachia* genomes from the NCBI database. The analysis revealed  
492 three distinct monophyletic clades, all with posterior probabilities >0.9. Each of these  
493 clades represent one super group of *Wolbachia* (Figure 4). Of these three supergroups,  
494 two have been found only in arthropods (super groups A and B), and the third super  
495 group is found only in filarial nematodes (super group C; Werren, Baldo & Clark,  
496 2008). In the phylogenetic analysis, wFex clustered with the *Wolbachia* strains within  
497 super group A, and most closely matched the strain that infects the scale insect,  
498 *Dactylopius coccus*, (wDacA). This is consistent with earlier studies on *Wolbachia* in  
499 ants, which also found supergroup A in the majority of the infected ants (Werren &  
500 Windsor, 2000).

501 Given that wFex affiliates with the supergroup A in our phylogenetic analysis, we  
502 investigated the extent to which its gene content aligned with that of other *Wolbachia*  
503 genomes in the same supergroup. We found that 525 genes were shared across all  
504 strains in this supergroup, including wFex (Figure 5). About 20% of these genes had  
505 no match to known proteins, whereas the remaining genes matched a wide range of  
506 predicted functions (Ellegaard et al., 2013; Lindsey et al., 2016). We also found  
507 strain-specific genes (wFex - 50 genes, wMel - 4 genes, wRi - 3 genes, wDac - 9  
508 genes). The wFex-specific genes included inferred annotations including Ankyrin  
509 repeat protein, ATP synthase, and chromosome partition protein (Supplementary  
510 Table S8). These strain-specific genes can provide an interesting snapshot of the  
511 evolutionary dynamics of a species. For example, ankyrin repeat proteins are involved  
512 in numerous functional processes, and have been suggested to play an important role  
513 in host-symbiont interactions (Li, Mahajan & Tsai, 2006). Comparative analyses  
514 suggest that they may be involved in host communication and reproductive  
515 phenotypes (Voronin & Kiseleva, 2008).

516

517 To explore differences in gene content between CI-inducing and mutualist strains of  
518 *Wolbachia*, homologous genes in six CI-inducing strains, and three mutualist strains  
519 were aligned and compared (Lindsey et al., 2016). The mutualist *Wolbachia* strains  
520 (range: 644-805 genes) had fewer genes than the CI-inducing ones (range: 911-1,275  
521 genes). The CI-inducing strains shared 84 genes not found in the mutualist strains. We  
522 found 80 (95.23%) of these 84 genes in wFex (Supplementary Figure S3), suggesting  
523 that wFex may be CI-inducing.

524

## 525 **Horizontal gene transfers, and functional novelty**

526 Intracellular symbionts can contribute new genes or fragments of genes to the host  
527 genome via horizontal gene transfer (Keeling & Palmer, 2008; Werren, Baldo &  
528 Clark, 2008; Dunning Hotopp, 2011). We found evidence for ancestral horizontal  
529 transfer from *Wolbachia* to the host *F. exsecta* in five scaffolds (scaffold83,  
530 scaffold233, scaffold574, scaffold707, scaffold741). The four largest transfers are 13  
531 to 47 kb long, and include 83 putative functional protein coding genes, whereas the  
532 fifth and smallest insertion (475 bp) lacks protein coding genes other than a  
533 degenerate *Wolbachia* transposase. This transposase is present in 7 out of 29



534 published *Wolbachia* genomes. Our analysis shows that similar transfer events of this  
535 homologous fragment apparently also have occurred from *Wolbachia* to the genomes  
536 of the ants *Vollenhovia emeryi* (gene: LOC105557741), and *Cardiocondyla obscurior*  
537 (scaffolds scf7180001101632 and scf7180001108526), as well as the microfilarial  
538 nematode *Brugia pahangi*, the Arizona spittle bug *Clastoptera arizona*, and the  
539 parasitoid wasp *Diachasma alloeum*.

540 One-third of invertebrate genomes are thought to contain recent *Wolbachia* gene  
541 insertions, ranging in size from short segments (<600 bp), to nearly the entire genome  
542 (Hotopp et al., 2007; Werren, Baldo & Clark, 2008). Most of these transferred  
543 fragments contained transposable elements, as well as some other functional genes  
544 from the *Wolbachia* genome. The HGT events from *Wolbachia* to *F. exsecta* are  
545 located in or near regions with transposases. Our blast results suggest that four of the  
546 insert regions had *Wolbachia* transposases, whereas one insert region has a  
547 transposase of ant origin. Whether the presence of such transposases close to HGT  
548 sites facilitates insertions is unknown. Interestingly, the putative functional protein-  
549 coding genes of *Wolbachia* inserted in the *F. exsecta* genome are similar to the genes  
550 reported in similar HGTs events in other insect genomes (eg: ABC transporter,  
551 Ankyrin repeat containing protein (Table 4) (Brelsfoard et al., 2014; International  
552 Glossina Genome Initiative, 2014). This could indicate that some HGT events are  
553 either more likely to occur or to be retained for reasons that could be neutral or  
554 adaptive to the host or to the endosymbiont. The transcriptome of *F. exsecta* shows  
555 that at least 6 out of the 83 genes from the *Wolbachia* HGT regions are transcribed  
556 but with a low FPKM values (range 0.04 to 1.6). These low level transcription trait  
557 often observed in bacteria-eukaryote HGTs (Hotopp et al., 2007; Nikoh et al., 2008;  
558 Dunning Hotopp, 2011).

## 559 **Conclusions**

560 Here we present the first draft genome of the ant *F. exsecta*, and its *Wolbachia*  
561 endosymbiont. This is the first report of a *Wolbachia* genome from ants, and provides  
562 insights into its phylogenetic position. We further identified multiple HGT events  
563 from *Wolbachia* to *F. exsecta*. Some of these have also occurred in parallel in several  
564 other insect genomes, highlighting the extent of HGTs in eukaryotes. We expect that  
565 the *F. exsecta* genome will be a valuable resource in understanding the molecular

566 basis of the evolution of social organization in ants: Recent genomic comparisons  
567 between *Formica selysi* and *S. invicta* have shown convergent evolution of a social  
568 chromosome, that underpins social organisation in these ants (Purcell et al., 2014).  
569 Additional comparison of these genomic regions with *F. exsecta* could provide  
570 valuable insights on the evolution of genomic architectures underlying social  
571 organization.

572

### 573 **Acknowledgements**

574 The authors thank Kalevi Trontti, Jenni Paviala and Minttu Ahjos for help with the  
575 laboratory work, Pekka Pamilo, Jonna Kulmuni for useful comments on an earlier  
576 draft of the manuscript. This work was funded by the Academy of Finland (Centre of  
577 Excellence in Biological Interactions, grants no. 252411 and 284666 to L.  
578 Sundström), the University of Helsinki (to L. Sundström), the Biotechnology and  
579 Biological Sciences Research Council (grant no. BB/K004204/1 to Yannick Wurm)  
580 and the Natural Environment Research Council (grant NE/L00626X/1 to Yannick  
581 Wurm).

582

### 583 **References**

584

585 Agosti D., Hauschteck-Jungen E. 1987. Polymorphism of males in *Formica exsecta*  
586 Nyl. (Hym.: Formicidae). Insectes Sociaux 34:280–290. DOI: 10.1007/BF02224360.

587

588 Aikawa et.al., 2009. Longicorn beetle that vectors pinewood nematode carries many  
589 *Wolbachia* genes on an autosome. Proceedings of the Royal Society B: Biological  
590 Sciences 276:3791–3798. DOI: 10.1098/rspb.2009.1022.

591

592 Altschul et.al., 1990. Basic local alignment search tool. Journal of Molecular Biology  
593 215:403–410. DOI: 10.1016/S0022-2836(05)80360-2.

594

595 Bateman et.al., 2004. The Pfam protein families database. Nucleic Acids Research  
596 32:D138-41. DOI: 10.1093/nar/gkh121.

597

598 Bonasio et.al 2010. Genomic comparison of the ants *Camponotus floridanus* and  
599 *Harpegnathos saltator*. Science 329:1068–1071. DOI: 10.1126/science.1192428.

600

601 Boomsma et.al., 2017. The Global Ant Genomics Alliance (GAGA). Myrmecological  
602 News 25:61–66.

603

- 604 Boto L. 2014. Horizontal gene transfer in the acquisition of novel traits by metazoans.  
605 Proceedings of the Royal Society B: Biological Sciences 281:20132450. DOI:  
606 10.1098/rspb.2013.2450.  
607  
608  
609 Brelsfoard et.al., 2014. Presence of extensive Wolbachia symbiont insertions  
610 discovered in the genome of its host *Glossina morsitans morsitans*. PLoS Neglected  
611 Tropical Diseases 8:e2728. DOI: 10.1371/journal.pntd.0002728.  
612  
613 Brian J. Haas. 2011. TransposonPSI. <http://transposonpsi.sourceforge.net>  
614  
615 Bruto et.al., 2014. Frequent, independent transfers of a catabolic gene from bacteria to  
616 contrasted filamentous eukaryotes. Proceedings of the Royal Society of London B:  
617 Biological Sciences. 281(1789): 20140848. DOI: 10.1098/rspb.2014.0848  
618  
619 Cantarel et.al., 2008. MAKER: an easy-to-use annotation pipeline designed for  
620 emerging model organism genomes. Genome Research 18:188–96. DOI:  
621 10.1101/gr.6743907.  
622  
623  
624 Casacuberta E., González J. 2013. The impact of transposable elements in  
625 environmental adaptation. Molecular Ecology 22:1503–1517. DOI:  
626 10.1111/mec.12170.  
627  
628 Cordaux R., Michel-Salzat A., Bouchon D. 2001. Wolbachia infection in crustaceans:  
629 novel hosts and potential routes for horizontal transmission. Journal of Evolutionary  
630 Biology 14:237–243. DOI: 10.1046/j.1420-9101.2001.00279.x.  
631  
632 Crozier RH. 1975. Hymenoptera. Animal Cytogenetics:95. ISBN:9783443260040  
633  
634 Dhaygude et.al. 2017. Transcriptome sequencing reveals high isoform diversity in the  
635 ant *Formica exsecta*. PeerJ 5:e3998. DOI: 10.7717/peerj.3998.  
636  
637 Drăgan et.al., 2016. GeneValidator: identify problems with protein-coding gene  
638 predictions. Bioinformatics 32:1559–1561. DOI: 10.1093/bioinformatics/btw015.  
639  
640 Dunning Hotopp JC. 2011. Horizontal gene transfer between bacteria and animals.  
641 Trends in Genetics 27:157–163. DOI: 10.1016/j.tig.2011.01.005.  
642  
643 Ellegaard et.al., 2013. Comparative genomics of Wolbachia and the bacterial species  
644 concept. PLoS Genetics 9:e1003381. DOI: 10.1371/journal.pgen.1003381.  
645  
646 Favreau et.al., 2018. Genes and genomic processes underpinning the social lives of  
647 ants. Current Opinion in Insect Science 25:83–90. DOI: 10.1016/J.COIS.2017.12.001.  
648  
649 Fenn et.al., 2006. Phylogenetic relationships of the Wolbachia of nematodes and  
650 arthropods. PLoS Pathogens 2:e94. DOI: 10.1371/journal.ppat.0020094.  
651

- 652 Ferree et al. 2005. *Wolbachia* utilizes host microtubules and dynein for anterior  
653 localization in the *Drosophila* oocyte. PLoS Pathogens 1:e14. DOI:  
654 10.1371/journal.ppat.0010014.  
655
- 656 Fitzpatrick DA. 2012. Horizontal gene transfer in fungi. FEMS Microbiology Letters  
657 329:1–8. DOI: 10.1111/j.1574-6968.2011.02465.x.  
658
- 659 González et.al., 2010. Genome-wide patterns of adaptation to temperate environments  
660 associated with transposable elements in *Drosophila*. PLoS Genetics 6:e1000905.  
661 DOI: 10.1371/journal.pgen.1000905.  
662
- 663 Goodacre et.al. 2006. *Wolbachia* and other endosymbiont infections in spiders.  
664 Molecular Ecology 15:517–527. DOI: 10.1111/j.1365-294X.2005.02802.x.  
665
- 666 Gurevich A., Saveliev V., Vyahhi N., Tesler G. 2013. QUAST: quality assessment  
667 tool for genome assemblies. Bioinformatics 29:1072–1075. DOI:  
668 10.1093/bioinformatics/btt086.  
669
- 670 Haag-Liautard et al., 2009. Fitness and the level of homozygosity in a social insect.  
671 Journal of Evolutionary Biology 22:134–42. DOI: 10.1111/j.1420-9101.2008.01635.x  
672
- 673 Henson J., Tischler G., Ning Z. 2012. Next-generation sequencing and large genome  
674 assemblies. Pharmacogenomics 13:901–15. DOI: 10.2217/pgs.12.72.  
675
- 676 Holt C., Yandell M. 2011. MAKER2: an annotation pipeline and genome-database  
677 management tool for second-generation genome projects. BMC Bioinformatics  
678 12:491. DOI: 10.1186/1471-2105-12-491.  
679
- 680 Hotopp et.al., 2007. Widespread lateral gene transfer from intracellular bacteria to  
681 multicellular eukaryotes. Science 317:1753–1756. DOI: 10.1126/science.1142490.  
682
- 683 Huang Y., Niu B., Gao Y., Fu L., Li W. 2010. CD-HIT Suite: a web server for  
684 clustering and comparing biological sequences. Bioinformatics 26:680–682. DOI:  
685 10.1093/bioinformatics/btq003.  
686
- 687 International Glossina Genome Initiative. 2014. Genome sequence of the tsetse fly  
688 (*Glossina morsitans*): vector of African trypanosomiasis. Science (New York, N.Y.)  
689 344:380–6. DOI: 10.1126/science.1249656.  
690
- 691 Johnson BR., Tsutsui ND. 2011. Taxonomically restricted genes are associated with  
692 the evolution of sociality in the honey bee. BMC Genomics 12:164. DOI:  
693 10.1186/1471-2164-12-164.  
694
- 695 Keeling PJ., Palmer JD. 2008. Horizontal gene transfer in eukaryotic evolution.  
696 Nature Reviews Genetics 9:605–618. DOI: 10.1038/nrg2386.  
697
- 698 Keller et.al., 2001. Sex ratio and *Wolbachia* infection in the ant *Formica exsecta*.  
699 Heredity 87:227–33. DOI:10.1046/j.1365-2540.2001.00918.x  
700

- 701 Khalturin et.al. 2009. More than just orphans: are taxonomically-restricted genes  
702 important in evolution? *Trends in Genetics* 25:404–413. DOI:  
703 10.1016/j.tig.2009.07.006.  
704
- 705 Klasson et.al., 2009a. Horizontal gene transfer between *Wolbachia* and the mosquito  
706 *Aedes aegypti*. *BMC Genomics* 10:33. DOI: 10.1186/1471-2164-10-33.  
707
- 708 Klasson et.al. 2009b. The mosaic genome structure of the *Wolbachia* wRi strain  
709 infecting *Drosophila simulans*. *Proceedings of the National Academy of Sciences*  
710 106:5725–5730. DOI: 10.1073/pnas.0810753106.  
711
- 712 Kondo et.al. 2002. Genome fragment of *Wolbachia* endosymbiont transferred to X  
713 chromosome of host insect. *Proceedings of the National Academy of Sciences*  
714 99:14280–14285. DOI: 10.1073/pnas.222228199.  
715
- 716 Korf I. 2004. Gene finding in novel genomes. *BMC Bioinformatics* 5:59. DOI:  
717 10.1186/1471-2105-5-59.  
718
- 719 Koski LB., Gray MW., Lang BF., Burger G. 2005. AutoFACT: an automatic  
720 functional annotation and classification tool. *BMC Bioinformatics* 6:151. DOI:  
721 10.1186/1471-2105-6-151.  
722
- 723 Kumar et.al. 2013. Blobology: exploring raw genome data for contaminants,  
724 symbionts and parasites using taxon-annotated GC-coverage plots. *Frontiers in*  
725 *Genetics* 4:237. DOI: 10.3389/fgene.2013.00237.  
726
- 727 Kurtz et.al. 2004. Versatile and open software for comparing large genomes. 5.  
728 *Genome Biology* 20045:R12. DOI:10.1186/gb-2004-5-2-r12  
729
- 730 Lasken RS., Stockwell TB. 2007. Mechanism of chimera formation during the  
731 Multiple Displacement Amplification reaction. *BMC Biotechnology* 7:19. DOI:  
732 10.1186/1472-6750-7-19.  
733
- 734 Li J., Mahajan A., Tsai M-D. 2006. Ankyrin Repeat: A unique motif mediating  
735 protein–protein interactions. *Biochemistry* 45:15168–15178. DOI:  
736 10.1021/bi062188q.  
737
- 738 Lindsey ARI., Werren JH., Richards S., Stouthamer R. 2016. Comparative genomics  
739 of a parthenogenesis-inducing *Wolbachia* symbiont. *G3 (Bethesda, Md.)* 6:2113–23.  
740 DOI: 10.1534/g3.116.028449.  
741
- 742 Mackenzie A., Leeming GL., Jowett AK., Ferguson MW., Sharpe PT. 1991. The  
743 homeobox gene Hox 7.1 has specific regional and temporal expression patterns  
744 during early murine craniofacial embryogenesis, especially tooth development in vivo  
745 and in vitro. *Development (Cambridge, England)* 111:269–85.  
746
- 747 Magrane M., Consortium U. 2011. UniProt Knowledgebase: a hub of integrated  
748 protein data. *Database* 2011:bar009-bar009. DOI: 10.1093/database/bar009.  
749

- 750 Matveeva T V., Lutova LA. 2014. Horizontal gene transfer from *Agrobacterium* to  
751 plants. *Frontiers in Plant Science* 5:326. DOI: 10.3389/fpls.2014.00326.  
752
- 753 McNulty SN., Fischer K., Curtis KC., Weil GJ., Brattig NW., Fischer PU. 2013.  
754 Localization of *Wolbachia*-like gene transcripts and peptides in adult *Onchocerca*  
755 *flexuosa* worms indicates tissue specific expression. *Parasites & Vectors* 6:2. DOI:  
756 10.1186/1756-3305-6-2.  
757
- 758 Moya A., Peretó J., Gil R., Latorre A. 2008. Learning how to live together: genomic  
759 insights into prokaryote–animal symbioses. *Nature Reviews Genetics* 9:218–229.  
760 DOI: 10.1038/nrg2319.  
761
- 762 Nikoh N., McCutcheon JP., Kudo T., Miyagishima S., Moran NA., Nakabachi A.  
763 2010. Bacterial genes in the aphid genome: absence of functional gene transfer from  
764 *Buchnera* to its host. *PLoS Genetics* 6:e1000827. DOI:  
765 10.1371/journal.pgen.1000827.  
766
- 767 Nikoh N., Nakabachi A. 2009. Aphids acquired symbiotic genes via lateral gene  
768 transfer. *BMC Biology* 7:12. DOI: 10.1186/1741-7007-7-12.  
769
- 770 Nikoh et.al. 2008. *Wolbachia* genome integrated in an insect chromosome: evolution  
771 and fate of laterally transferred endosymbiont genes. *Genome Research* 18:272–80.  
772 DOI: 10.1101/gr.7144908.  
773
- 774 Normark BB. 2003. The evolution of alternative genetic systems in insects. *Annual*  
775 *Review of Entomology* 48:397–423. DOI: 10.1146/annurev.ento.48.091801.112703.  
776
- 777 O’Leary et.al. 2016. Reference sequence (RefSeq) database at NCBI: current status,  
778 taxonomic expansion, and functional annotation. *Nucleic Acids Research* 44:D733–  
779 D745. DOI: 10.1093/nar/gkv1189.  
780
- 781 Parra G., Bradnam K., Korf I., Bateman A. 2007. CEGMA: a pipeline to accurately  
782 annotate core genes in eukaryotic genomes. *Bioinformatics* 23:1061–1067. DOI:  
783 10.1093/bioinformatics/btm071.  
784
- 785 Purcell J., Brelsford A., Wurm Y., Perrin N., Chapuisat M. 2014. Convergent genetic  
786 architecture underlies social organization in ants. *Current Biology* □: CB 24:2728–32.  
787 DOI: 10.1016/j.cub.2014.09.071.  
788
- 789 Rambaut A. 2012. Figtree Tool (<http://tree.bio.ed.ac.uk/software/figtree/>)  
790
- 791 Ramírez-Puebla et.al., 2016. Genomes of *Candidatus Wolbachia bourtzisii* wDacA  
792 and *Candidatus Wolbachia pipientis* wDacB from the cochineal insect *Dactylopius*  
793 *coccus* (Hemiptera: Dactylopiidae). *G3 (Bethesda, Md.)* 6:3343–3349. DOI:  
794 10.1534/g3.116.031237.  
795
- 796 Reuter M., Keller L. 2003. High levels of multiple *Wolbachia* infection and  
797 recombination in the ant *Formica exsecta*. *Molecular Biology and Evolution* 20:748–  
798 753. DOI: 10.1093/molbev/msg082.  
799

- 800 Rolland T., Neuvéglise C., Sacerdot C., Dujon B. 2009. Insertion of horizontally  
801 transferred genes within conserved syntenic regions of Yeast genomes. PLoS One  
802 4:e6515. DOI: 10.1371/journal.pone.0006515.  
803
- 804 Ronquist F., Huelsenbeck JP. 2003. MrBayes 3: Bayesian phylogenetic inference  
805 under mixed models. Bioinformatics (Oxford, England) 19:1572–4.  
806
- 807 Rosengren M., Rosengren R., Söderlund V. 2009. Chromosome numbers in the genus  
808 Formica with special reference to the taxonomical position of *Formica uralensis*  
809 *Ruzsk.* and *Formica truncorum* Fabr. Hereditas 92:321–325. DOI: 10.1111/j.1601-  
810 5223.1980.tb01715.x.  
811
- 812 Rostant WG., Wedell N., Hosken DJ. 2012. Transposable elements and insecticide  
813 resistance. Advances in Genetics 78:169–201. DOI: 10.1016/B978-0-12-394394-  
814 1.00002-X.  
815
- 816 Roux J., Privman E., Moretti S., Daub JT., Robinson-Rechavi M., Keller L. 2014.  
817 Patterns of positive selection in seven ant genomes. Molecular Biology and Evolution  
818 31:1661–1685. DOI: 10.1093/molbev/msu141.  
819
- 820 Salzberg SL., Delcher AL., Kasif S., White O. 1998. Microbial gene identification  
821 using interpolated Markov models. Nucleic Acids Research 26:544–8.  
822
- 823 Schönknecht G., Weber APM., Lercher MJ. 2014. Horizontal gene acquisitions by  
824 eukaryotes as drivers of adaptive evolution. BioEssays 36:9–20. DOI:  
825 10.1002/bies.201300095.  
826
- 827 Schrader et.al. 2014. Transposable element islands facilitate adaptation to novel  
828 environments in an invasive species. Nature Communications 5:5495. DOI:  
829 10.1038/ncomms6495.  
830
- 831 Sievers F., Higgins DG. 2014. Clustal Omega, accurate alignment of very large  
832 numbers of sequences. In: Methods in Molecular Biology (Clifton, N.J.). 105–116.  
833 DOI: 10.1007/978-1-62703-646-7\_6.  
834
- 835 Sigrist CJA., Cerutti L., de Castro E., Langendijk-Genevaux PS., Bulliard V., Bairoch  
836 A., Hulo N. 2010. PROSITE, a protein domain database for functional  
837 characterization and annotation. Nucleic Acids Research 38:D161-6. DOI:  
838 10.1093/nar/gkp885.  
839
- 840 Simão et.al. 2015. BUSCO: assessing genome assembly and annotation completeness  
841 with single-copy orthologs. Bioinformatics 31:3210–3212. DOI:  
842 10.1093/bioinformatics/btv351.  
843
- 844 Simpson JT., Durbin R. 2012. Efficient de novo assembly of large genomes using  
845 compressed data structures. Genome Research 22:549–556. DOI:  
846 10.1101/gr.126953.111.  
847
- 848 Slater GSC., Birney E. 2005. Automated generation of heuristics for biological  
849 sequence comparison. BMC Bioinformatics 6:31. DOI: 10.1186/1471-2105-6-31.

- 850  
851 Smit., AFA., Hubley R., Green P. 2015. RepeatMasker Open-4.0.  
852 <http://www.repeatmasker.org/>  
853  
854 Stanke M., Morgenstern B. 2005. AUGUSTUS: a web server for gene prediction in  
855 eukaryotes that allows user-defined constraints. *Nucleic Acids Research* 33:W465-7.  
856 DOI: 10.1093/nar/gki458.  
857  
858 Sun L V., Foster JM., Tzertzinis G., Ono M., Bandi C., Slatko BE., O'Neill SL. 2001.  
859 Determination of *Wolbachia* genome size by pulsed-field gel electrophoresis. *Journal*  
860 *of Bacteriology* 183:2219–25. DOI: 10.1128/JB.183.7.2219-2225.2001.  
861  
862 Sundström L. 1994. Sex ratio bias, relatedness asymmetry and queen mating  
863 frequency in ants. *Nature*. DOI:10.1038/367266a0  
864  
865 Sundström L., Chapuisat M., Keller L. 1996. Conditional manipulation of sex ratios  
866 by ant workers: a test of kin selection theory. *Science* 274:993–995. DOI:  
867 10.1126/science.274.5289.993  
868  
869 Sundström L., Keller L., Chapuisat M. 2003. Inbreeding and sex-biased gene flow in  
870 the ant *Formica exsecta*. *Evolution; international journal of organic evolution*  
871 57:1552–61. DOI:10.1111/j.0014-3820.2003.tb00363.x  
872  
873 Tautz D., Domazet-Lošo T. 2011. The evolutionary origin of orphan genes. *Nature*  
874 *Reviews Genetics* 12:692–702. DOI: 10.1038/nrg3053.  
875  
876 The Uniprot Consortium. 2017. UniProt: the universal protein knowledgebase.  
877 *Nucleic Acids Research* 45:D158–D169. DOI: 10.1093/nar/gkw1099.  
878  
879 Trapnell C., Pachter L., Salzberg SL. 2009. TopHat: discovering splice junctions with  
880 RNA-Seq. *Bioinformatics* 25:1105–1111. DOI: 10.1093/bioinformatics/btp120.  
881  
882 Trapnell et.al. 2010. Transcript assembly and quantification by RNA-Seq reveals  
883 unannotated transcripts and isoform switching during cell differentiation. *Nature*  
884 *Biotechnology* 28:511–515. DOI: 10.1038/nbt.1621.  
885  
886 Tsutsui ND., Suarez A V., Spagna JC., Johnston JS. 2008. The evolution of genome  
887 size in ants. *BMC Evolutionary Biology* 8:64. DOI: 10.1186/1471-2148-8-64.  
888  
889 Viljakainen L., Evans JD., Hasselmann M., Rueppell O., Tingek S., Pamilo P. 2009.  
890 Rapid evolution of immune proteins in social insects. *Molecular Biology and*  
891 *Evolution* 26:1791–1801. DOI: 10.1093/molbev/msp086.  
892  
893 Vitikainen E., Haag-Liautard C., Sundström L. 2011. Inbreeding and reproductive  
894 investment in the ant *Formica exsecta*. *Evolution* 65. DOI: 10.1111/j.1558-  
895 5646.2011.01273.x.  
896  
897 Vitikainen EIK., Haag-Liautard C., Sundström L. 2015. Natal dispersal, mating  
898 patterns, and inbreeding in the ant *Formica exsecta*. *The American naturalist*  
899 186:716–27. DOI: 10.1086/683799.



- 900  
901 Voronin DA., Kiseleva E V. 2008. Functional role of proteins containing ankyrin  
902 repeats. *Cell and Tissue Biology* 2:1–12. DOI: 10.1134/S1990519X0801001X.  
903
- 904 Wang Y., Coleman-Derr D., Chen G., Gu YQ. 2015. OrthoVenn: a web server for  
905 genome wide comparison and annotation of orthologous clusters across multiple  
906 species. *Nucleic Acids Research* 43:W78-84. DOI: 10.1093/nar/gkv487.  
907
- 908 Weinstock et.al., 2006. Insights into social insects from the genome of the honeybee  
909 *Apis mellifera*. *Nature* 443:931–949. DOI: 10.1038/nature05260.  
910
- 911 Wenseleers T., Ito F., Van Borm S., Huybrechts R., Volckaert F., Billen J. 1998.  
912 Widespread occurrence of the microorganism *Wolbachia* in ants. *Proceedings of the*  
913 *Royal Society B: Biological Sciences* 265:1447–1452. DOI: 10.1098/rspb.1998.0456.  
914
- 915 Werren JH. 1997. *Wolbachia* run amok. *Proceedings of the National Academy of*  
916 *Sciences of the United States of America* 94:11154–5.  
917
- 918 Werren JH., Baldo L., Clark ME. 2008. *Wolbachia*: master manipulators of  
919 invertebrate biology. *Nature Reviews Microbiology* 6:741–751. DOI:  
920 10.1038/nrmicro1969.  
921
- 922 Werren et.al. 2010. Functional and evolutionary insights from the genomes of three  
923 parasitoid *Nasonia* species. *Science* 327:343–348. DOI: 10.1126/science.1178028.  
924
- 925  
926 Werren JH., Windsor DM. 2000. *Wolbachia* infection frequencies in insects: evidence  
927 of a global equilibrium? *Proceedings. Biological sciences* 267:1277–85. DOI:  
928 10.1098/rspb.2000.1139.  
929
- 930 Wilson GA., Feil EJ., Lilley AK., Field D. 2007. Large-scale comparative genomic  
931 ranking of taxonomically restricted genes (TRGs) in bacterial and archaeal genomes.  
932 *PLoS One* 2:e324. DOI: 10.1371/journal.pone.0000324.  
933
- 934 Woolfit M., Iturbe-Ormaetxe I., McGraw EA., O’Neill SL. 2009. An ancient  
935 horizontal gene transfer between mosquito and the endosymbiotic bacterium  
936 *Wolbachia pipientis*. *Molecular Biology and Evolution* 26:367–374. DOI:  
937 10.1093/molbev/msn253.  
938
- 939 Wurm et.al. 2009. Fourmidable: a database for ant genomics. *BMC Genomics* 10:5.  
940 DOI: 10.1186/1471-2164-10-5.  
941
- 942 Wurm et.al., 2011. The genome of the fire ant *Solenopsis invicta*. *Proceedings of the*  
943 *National Academy of Sciences* 108:5679–5684. DOI: 10.1073/pnas.1009690108.  
944
- 945 Wybouw N., Pauchet Y., Heckel DG., Van Leeuwen T. 2016. Horizontal gene  
946 transfer contributes to the evolution of arthropod herbivory. *Genome Biology and*  
947 *Evolution* 8:1785–801. DOI: 10.1093/gbe/evw119.  
948

949 Xie et.al. 2014. SOAPdenovo-Trans: de novo transcriptome assembly with short  
950 RNA-Seq reads. *Bioinformatics* 30:1660–1666. DOI: 10.1093/bioinformatics/btu077.

951

952 Yang Z. 1997. PAML: a program package for phylogenetic analysis by maximum  
953 likelihood. *Computer Applications in the Biosciences* □: CABIOS 13:555–6.

954

955 Yue J., Hu X., Sun H., Yang Y., Huang J. 2012. Widespread impact of horizontal  
956 gene transfer on plant colonization of land. *Nature Communications* 3:1152. DOI:  
957 10.1038/ncomms2148.

958

959 Zerbino DR., Birney E. 2008. Velvet: Algorithms for de novo short read assembly  
960 using de Bruijn graphs. *Genome Research* 18:821–829. DOI: 10.1101/gr.074492.107.

961

962

### 963 **Data Accessibility**

964

965 The raw Illumina sequences of paired-end and mate-pair libraries are deposited on the  
966 National Center for Biotechnology Information (NCBI) under the bio-project number  
967 PRJNA393850, with the accession numbers SAMN07344805-SAMN07344811. The  
968 assembled genome sequence of *F. exsecta* is deposited on Genbank with the accession  
969 number NPM000000000. Similarly, the draft genome assembly of wFex is deposited  
970 under the project number PRJNA436771.

971

972

### 973 **List of Tables:**

974

975 Table 1: Summary statistics for the raw sequencing data, before and after filtering  
976 reads. “Coverage depth” was calculated based on the estimated assembled genome  
977 size (300 Mb).

978

979 Table 2: Genome assembly statistics for *F. exsecta* and its *Wolbachia* endosymbiont.

980

981 Table 3: BUSCO quality metrics for the *F. exsecta* genome and the *Wolbachia*  
982 endosymbiont of *F. exsecta* (wFex) genome assembly.

983

984 Table 4: HGT inserts from *Wolbachia* present in the genome of *F. exsecta* with details  
985 of length and position in the *F. exsecta* genome. The presence of similar insert regions  
986 in other eukaryote genomes is also shown.

987

988 **List of Figures:**

989

990 Figure 1. *De novo* genome assembly of *F. exsecta* genome, summarized by the  
991 following metrics: a) Overall assembly length, b) Number of scaffolds/contigs, c)  
992 Length of the longest scaffold/contig, d) Scaffold/contig N50 and N90, e) Percentage  
993 GCs and percentage Ns , f) BUSCO completeness, g) Scaffold/contig length/count  
994 distribution.

995

996 Figure 2. Taxonomic distribution of the best blastp hits of *F. exsecta* proteins to the  
997 non-redundant (nr) protein database ( $E < 10^{-5}$ ).

998

999 Figure 3. Venn diagram showing the distribution of gene families (orthologous  
1000 clusters) among five ant species including three closely related members of the  
1001 subfamily Formicinae (*Formica exsecta*, *Camponotus floridanus*, *Lasius niger*), and  
1002 two distinctly related ants (*Solenopsis invicta* and *Cerapachys biroi*).

1003

1004 Figure 4: Phylogeny of the *Wolbachia* supergroups A, B, and C strains with the newly  
1005 assembled wFex genome. The phylogenetic reconstructions are based on individual  
1006 analyses of 35 core genes of 25 *Wolbachia* strains. The support values on the branch  
1007 labels indicate Bayesian posterior probabilities. The letters A-C indicate the separate  
1008 supergroups.

1009

1010 Figure 5. Venn diagram displaying the overlap in orthologous genes among four  
1011 *Wolbachia* species including the newly assembled wFex strain and the wDac, wRi,  
1012 wMel strains reported previously.

1013 **Supplementary Tables:**

1014 S1: Comparison of assembly statistics of the *F. exsecta* genome and 13 other  
1015 published ant genomes.

1016 S2: List of genes specific to the Formicinae as identified by OrthoVenn.

1017 S3: List of species-specific genes in *F. exsecta*, as identified by OrthoVenn.

- 1018 S4: List of *F. exsecta* genes under positive or relaxed purifying selection (dN/dS  
1019 ratios > 1) in comparison to five other ant species (*Camponotus floridanus*, *Lasius*  
1020 *niger*, *Solenopsis invicta* and *Cerapachys biroi*)
- 1021 S5: List of *F. exsecta* genes showing dN/dS ratios > 1 in pairwise comparison to  
1022 *Camponotus floridanus*.
- 1023 S6: List of genes with paralogs in the wFex genome, which are present as single  
1024 copies in the wMel, wRi, wDac genomes.
- 1025 S7: List of conserved *Wolbachia* genes used for phylogenetic analysis.
- 1026 S8: List of species-specific genes in wFEX genome, as identified by OrthoVenn.
- 1027 **Supplementary Figures:**
- 1028 S1. TAGC plot of *F. exsecta*, and its *Wolbachia* endosymbiont. The TAGC plots were  
1029 taxonomically annotated, and the contigs with best similarity to Arthropoda and  
1030 Proteobacteria are highlighted in color.
- 1031
- 1032 S2. Visualization of genome coverage of wFex against the *Wolbachia* endosymbiont  
1033 of *Drosophila simulans* (wNo) genome, using the alignment software Mummer.
- 1034
- 1035 S3. Venn diagram displaying the overlap in orthologous genes across CI-inducing and  
1036 mutualist *Wolbachia* species.

**Figure 1** The de novo genome assembly of the *F. exsecta* genome summarized by different metrics: a) Overall assembly length, b) Number of scaffolds/contigs, c) Length of longest scaffold/contig, d) Scaffold/contig N50 and N90, e) Percentage GC and percentage Ns, f) BUSCO completeness. g) Scaffold/contig length/count distribution.

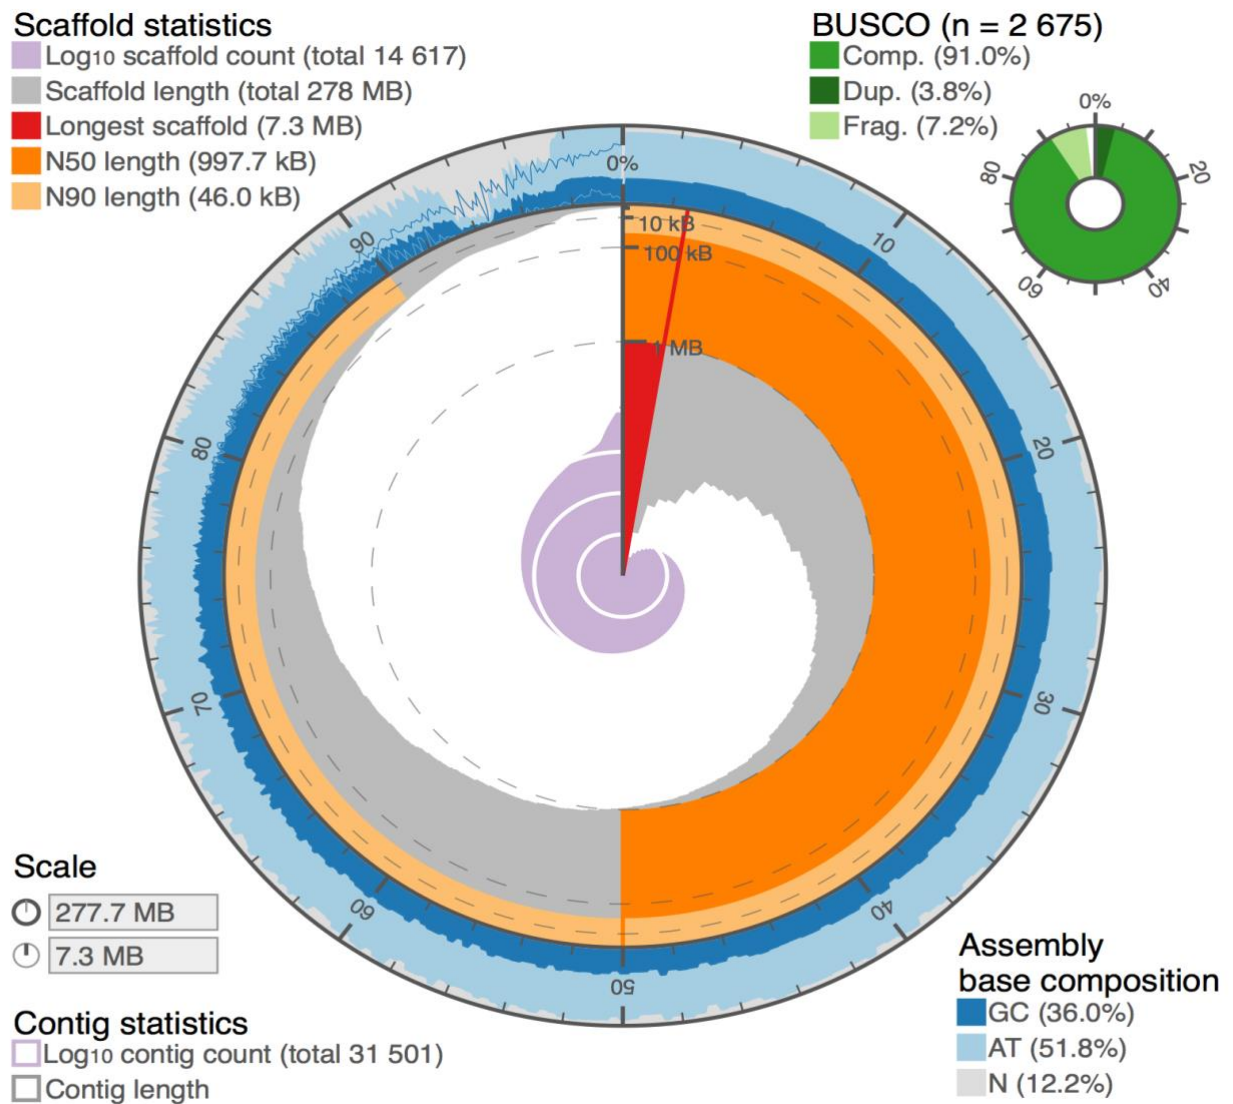

**Figure 2.** Taxonomic distribution of best blastP hits of *F. exsecta* proteins to the nonredundant (nr) protein database ( $E < 10^{-5}$ ).

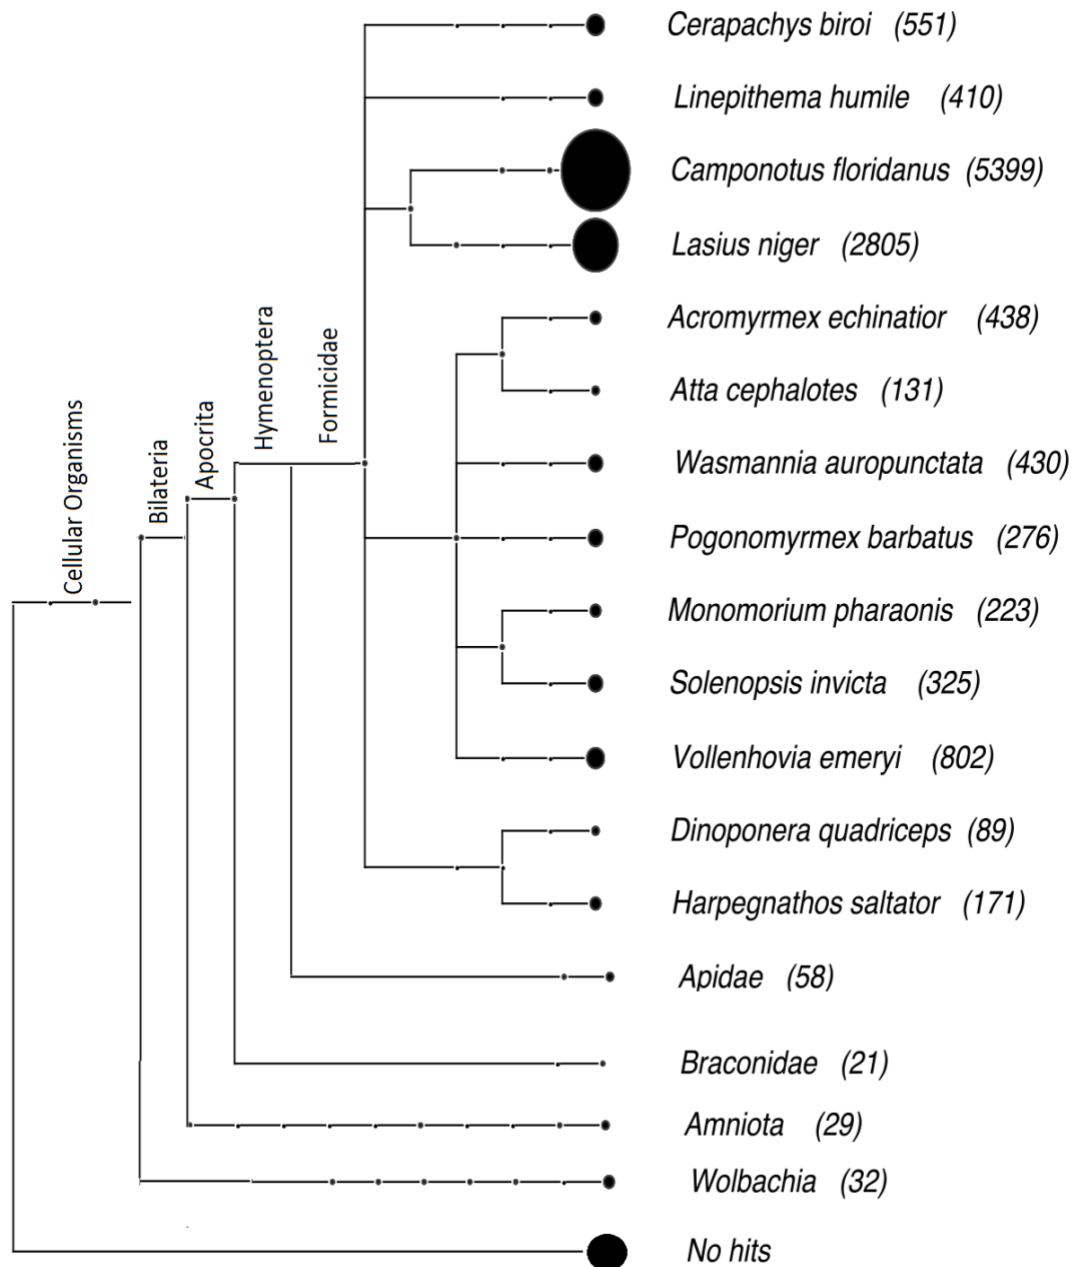

**Figure 3.** Venn diagram showing the distribution of gene families (orthologous clusters) among five ant species including closely related three members of subfamily Formicinae (*Formica exsecta*, *Camponotus floridanus*, *Lasius niger*) and other two distinctly related ants (*Solenopsis invicta* and *Cerapachys biroi*).

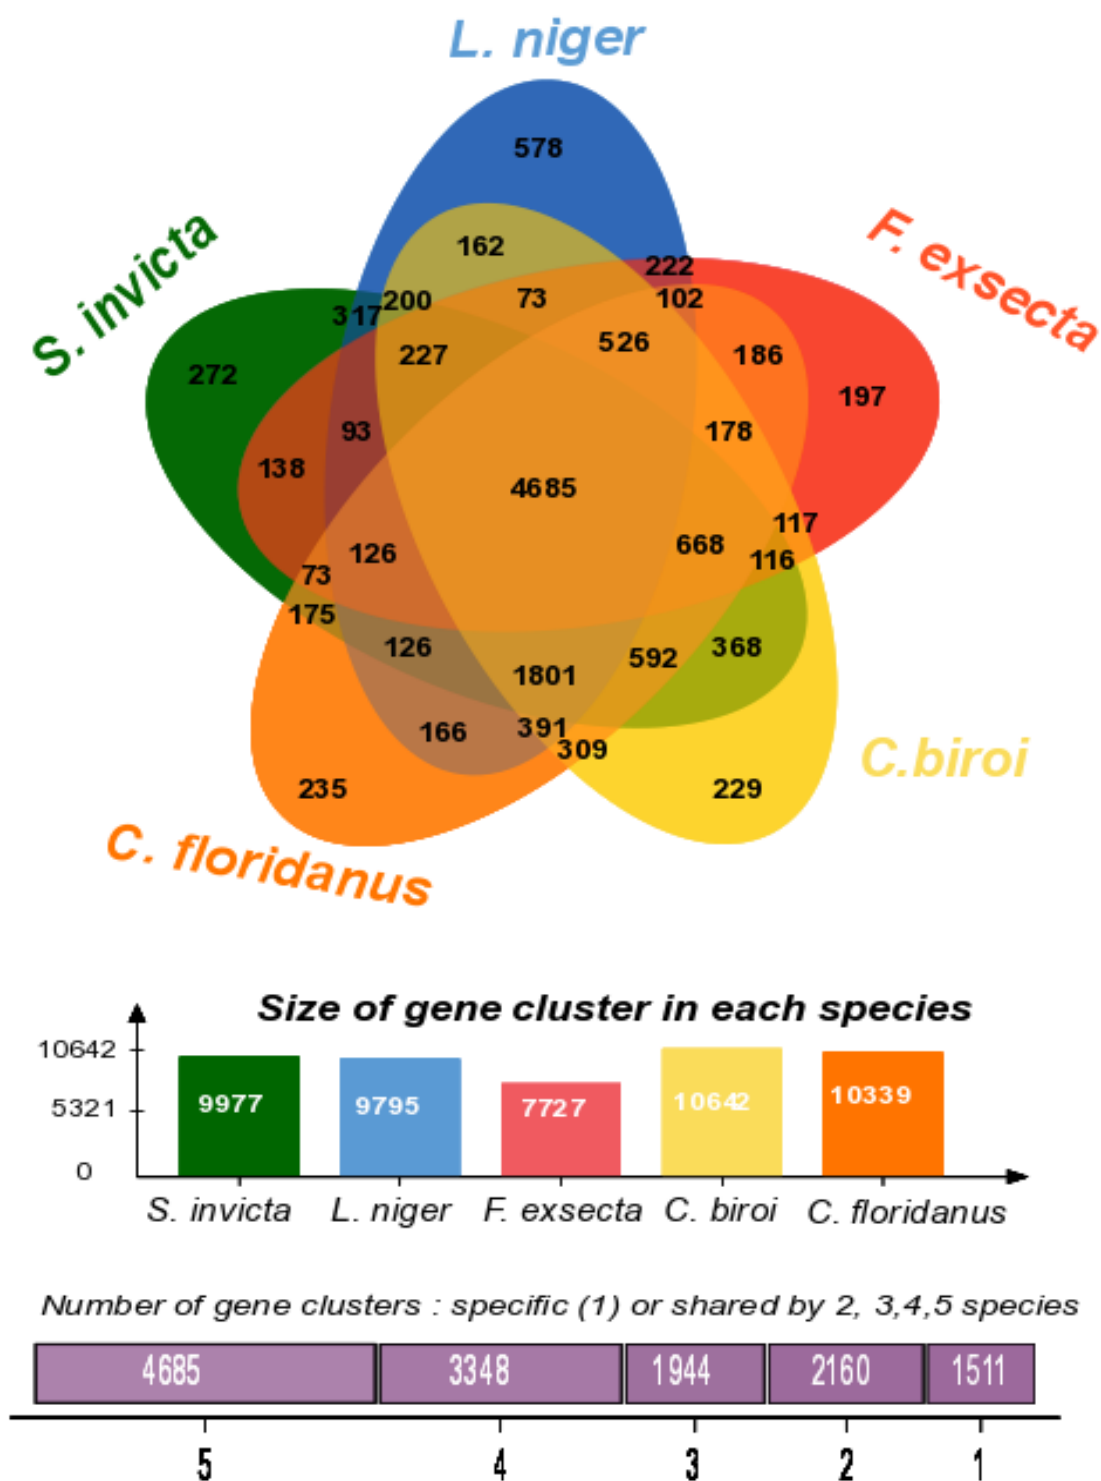

**Figure 4.** Phylogeny of the *Wolbachia* supergroups A, B, and C strains with the newly assembled wFex genome. Phylogenetic reconstructions based on individual analyses of 35 core gene of 25 *Wolbachia* strains. The numbers at the node indicate the posterior probabilities obtained from Bayesian phylogenetic analysis. Each Supergroup is labeled with letters A-C.

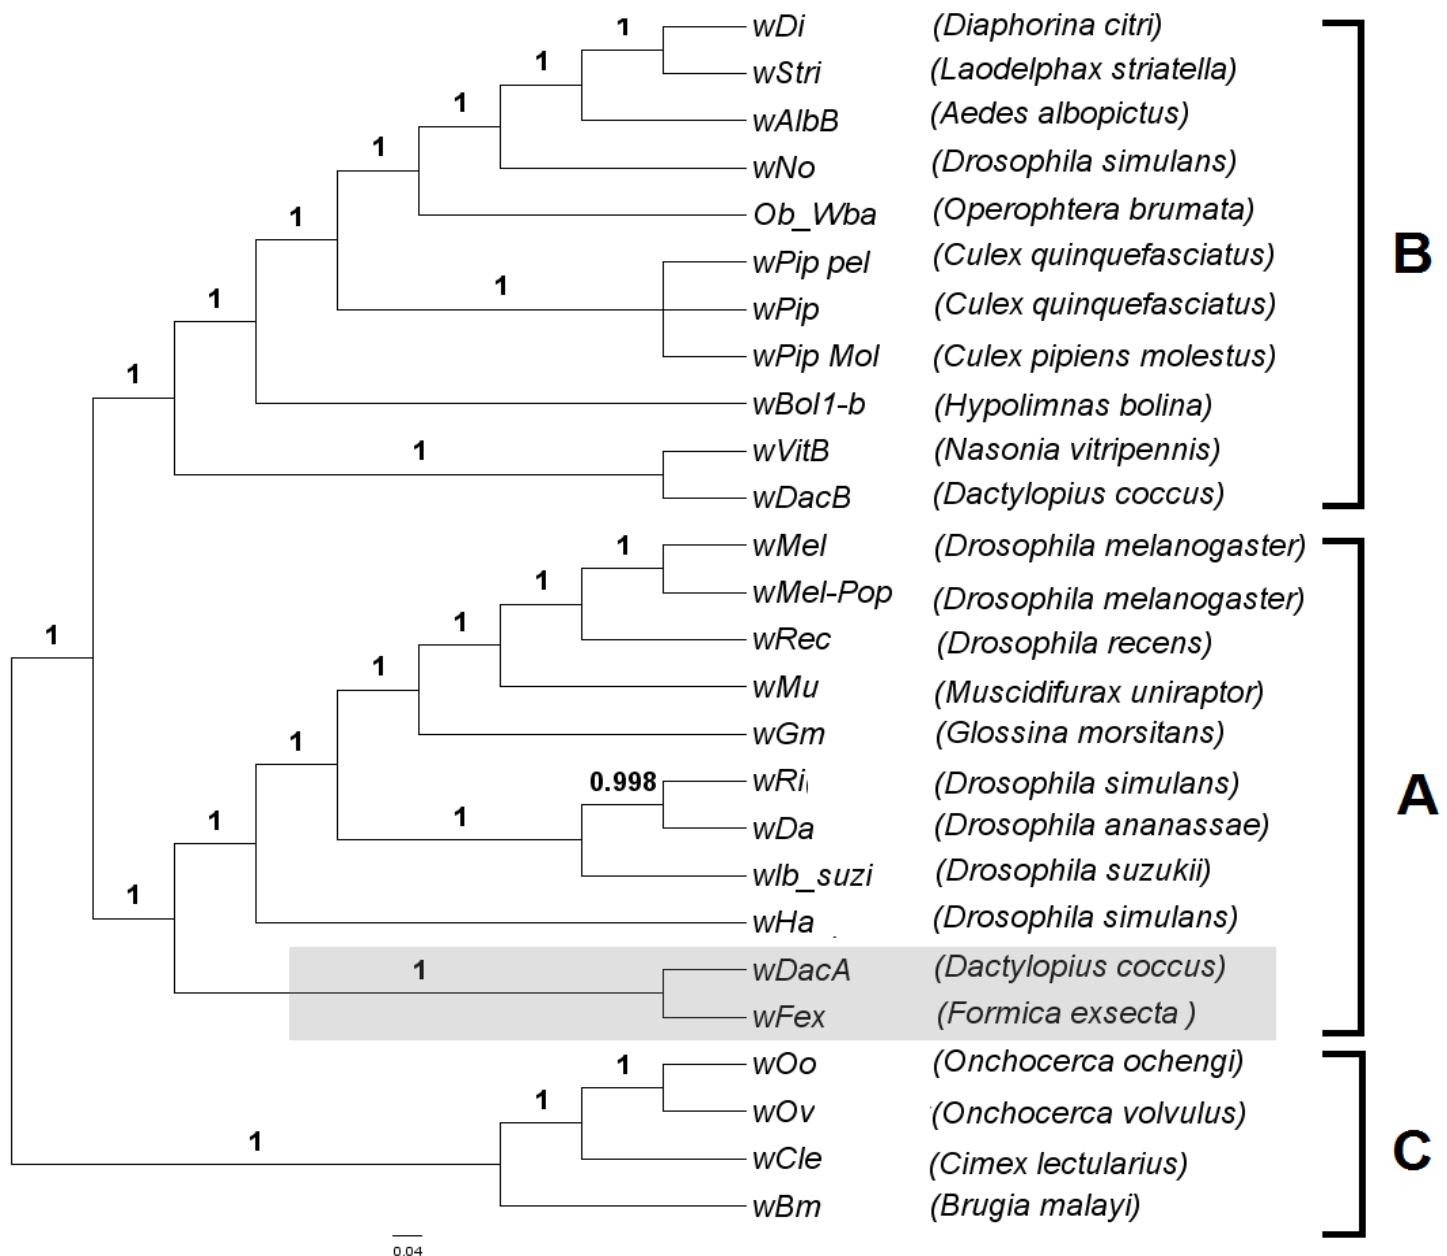



**Figure 5.** Venn diagram displaying overlap in orthologous gene among four *Wolbachia* species including newly assembled wFex strain and previously reported wDac, wRi, wMel strains.

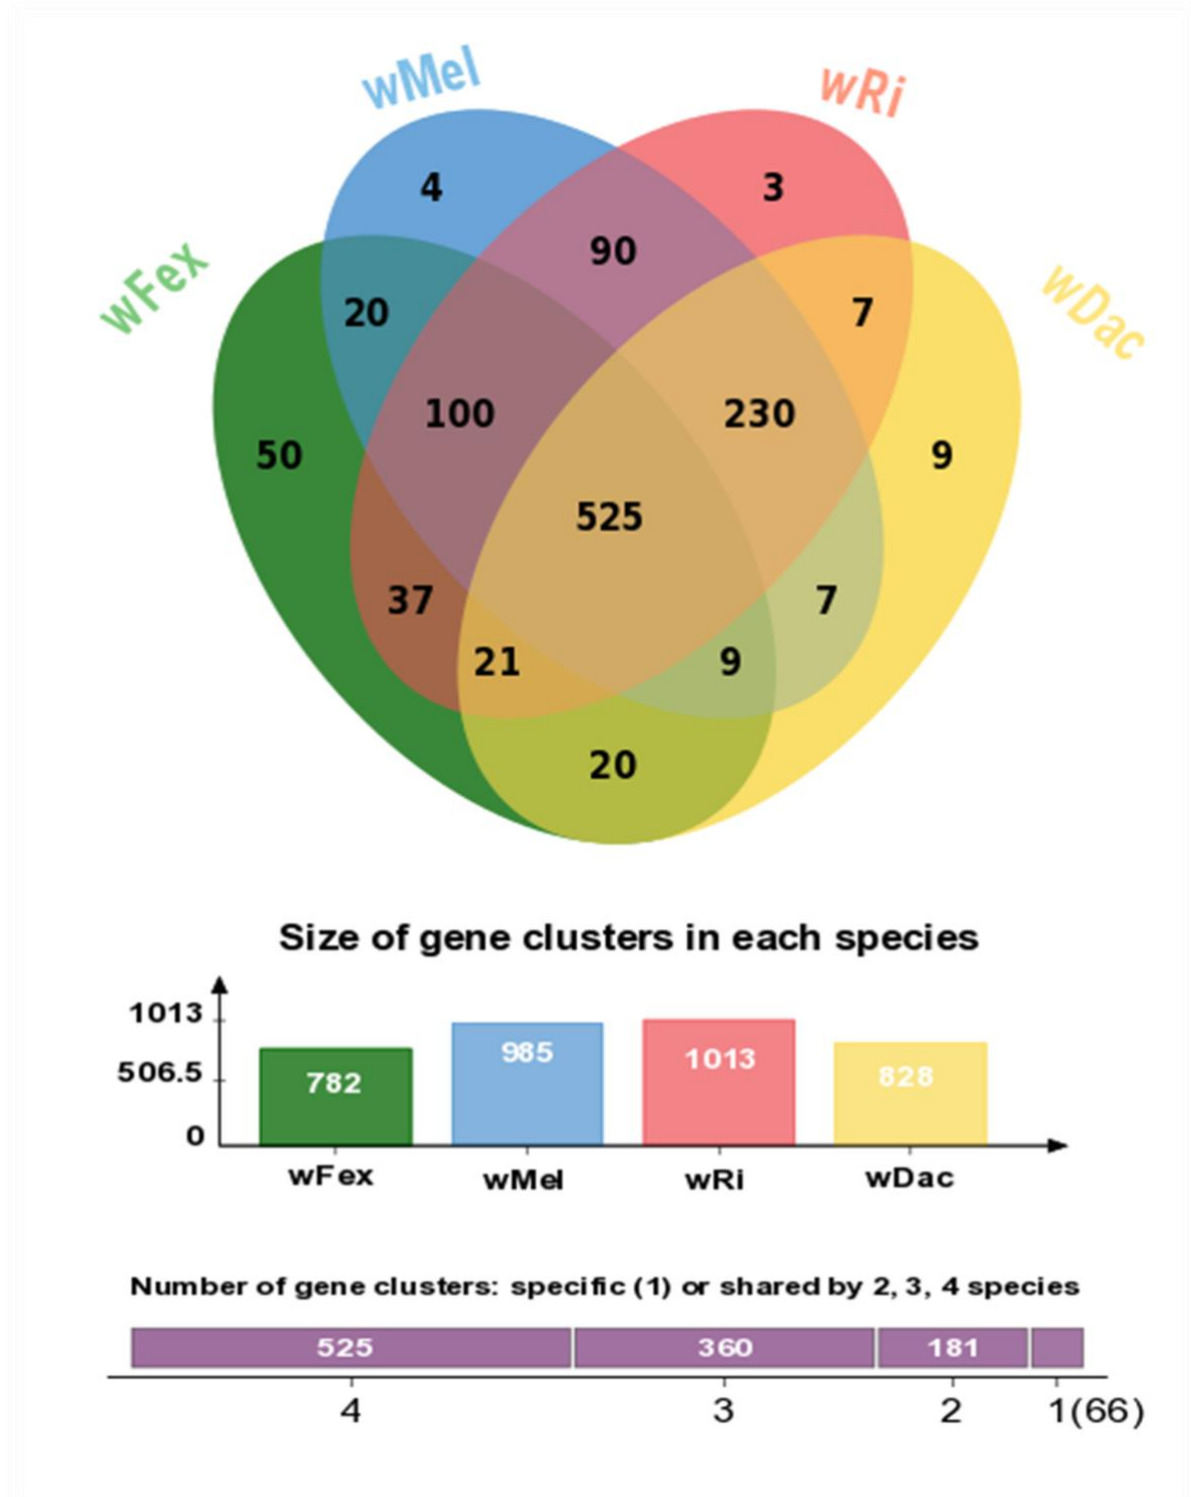

**Table 1.** Summary statistics of raw sequencing data before and after filtering the reads which was further used for the genome assembly. “Coverage depth” was calculated based on the assembled genome size (500 Mb).

| Insert Size | Pair reads<br>Length (bp) | Raw            |                          | After Filter   |                          |
|-------------|---------------------------|----------------|--------------------------|----------------|--------------------------|
|             |                           | Total Data (G) | Sequence<br>coverage (X) | Total Data (G) | Sequence<br>coverage (X) |
| 170bp       | 100 bp                    | 22.68          | 45.36                    | 20.96          | 41.93                    |
| 500bp       | 100 bp                    | 8.54           | 17.08                    | 7.34           | 14.69                    |
| 800bp       | 100 bp                    | 8.84           | 17.69                    | 5.14           | 10.29                    |
| 2kb         | 100 bp                    | 13.23          | 26.46                    | 7.05           | 14.10                    |
| 5kb         | 100 bp                    | 14.51          | 29.02                    | 4.74           | 9.49                     |
| 10kb        | 100 bp                    | 11.77          | 23.53                    | 5.51           | 11.02                    |
| 20kb        | 100 bp                    | 20.40          | 40.81                    | 2.91           | 5.81                     |
| Total       | --                        | 99.97          | 199.95                   | 53.66          | 107.32                   |

**Table 2.** Genome assembly statistics for *F. exsecta* and its *Wolbachia endosymbiont*.

| <b>Genome Assembly</b> | <b><i>Formica exsecta</i></b> | <b>FE <i>Wolbachia</i></b> |
|------------------------|-------------------------------|----------------------------|
| <b>Stats</b>           | <b>Genome</b>                 | <b>endosymbiont Genome</b> |
| Total length           | 277719392 (277 MB)            | 3096460 (3.09 MB)          |
| Total contigs          | 14617                         | 69                         |
| Contigs (>= 1000 bp)   | 3136 (98.24% genome)          | 68(99.97% genome)          |
| Contigs (>= 50000 bp)  | 545 (89.59% genome)           | 22(75.48% genome)          |
| N50:                   | 997654 bp                     | 104167 bp                  |
| N75:                   | 318356 bp                     | 54296 bp                   |
| L50:                   | 73                            | 11                         |
| L75:                   | 185                           | 22                         |
| GC (%)                 | 36.00                         | 35.13                      |

**Table 3.** BUSCO quality metrics for the *F. exsecta* genome and the *Wolbachia* endosymbiont of *F. exsecta* (*wFex*) genome assembly.

| BUSCO metric             | <i>F. exsecta</i> genome |              |              |              | <i>FE Wolbachia</i><br><i>endosymbiont Genome (wFex)</i> |                |
|--------------------------|--------------------------|--------------|--------------|--------------|----------------------------------------------------------|----------------|
|                          | Eukaryota                | Insecta      | Arthropoda   | Hymenoptera  | Bacteria                                                 | Proteobacteria |
| Complete                 | 299 (98.7%)              | 1634(98.5%)  | 2549(95.29%) | 4249 (96.2%) | 107 (72.30%)                                             | 158 (71.49%)   |
| Complete and single copy | 283 (93.4%)              | 1572 (94.8%) | 2446(91.44%) | 4151 (94.0%) | 35 (23.65%)                                              | 55 (24.88)     |
| Complete and duplicated  | 16 (5.3%)                | 62 (3.7%)    | 103 (3.86%)  | 98 (2.2%)    | 72 (48.65%)                                              | 103 (46.60%)   |
| Fragmented               | 1 (0.3%)                 | 15 (0.9%)    | 195 (7.29%)  | 123 (2.8%)   | 9 (6.08%)                                                | 11 (4.97%)     |
| Missing                  | 3 (1.0%)                 | 9 (0.6%)     | 34 (1.27%)   | 43 (1.0%)    | 32 (21.62%)                                              | 52 (23.52%)    |
| Total                    | 303 (100%)               | 1658 (100%)  | 2675 (100%)  | 4415 (100%)  | 148 (100%)                                               | 221 (100%)     |

**Table 4.** HGT inserts from *Wolbachia* present in the genome of *F. exsecta* with details of its length and position in the *F. exsecta* genome. The presence of similar insert regions in other eukaryote genomes is also shown.

| <i>Wolbachia</i> gene name                                                                                                                                 | HGT region in <i>F. exsecta</i> | Length HGT (bp) | Transposon region near HGT                       | Transposon Name                       | Observed in other species | Other Host Species name with position of similar insertion                                                                                                                                                                                                   |
|------------------------------------------------------------------------------------------------------------------------------------------------------------|---------------------------------|-----------------|--------------------------------------------------|---------------------------------------|---------------------------|--------------------------------------------------------------------------------------------------------------------------------------------------------------------------------------------------------------------------------------------------------------|
| Transposase                                                                                                                                                | scaffold83:2271642-2272117      | 475             | scaffold83:2271642-2272117                       | transposase                           | Complete                  | <i>Vollenhovia emeryi</i> (LOC105557741), <i>Cardiocondyla obscurior</i> (genes: scf7180001101632 and scf7180001108526), <i>Diachasma alloeum</i> (LOC107035412), <i>Brugia pahangi</i> (BPAG_contig0001587),                                                |
| ABC transporter ATP-binding protein, porphobilinogen deaminase, D-alanine--D-alanine ligase, DNA processing protein DprA , triose-phosphate isomerase      | scaffold233:1712452-1725498     | 13046           | scaffold233:1714122-1714241                      | transposase                           | Partial (few gene region) | <i>Vollenhovia emeryi</i> (NW_011967015.1,NW_011967060.1), <i>Wasmannia auropunctata</i> (scf7180000683207,scf7180000730160), <i>Rhagoletis zephyria</i> (NW_016158779.1), <i>Planococcus citri</i> (KF021963.1) , <i>Ctenocephalides felis</i> (KC177865.1) |
| DNA repair protein RadC, transposase, DNA ligase, ABC transporter permease, ATP-dependent protease La                                                      | scaffold574:102007-116197       | 14190           | scaffold574:105963-106483                        | transposase                           | Partial (few gene region) | <i>Vollenhovia emeryi</i> (LOC105557101,NW_011966940.1,NW_011966751.1 ), <i>Monomorium pharaonis</i> (scf7180001140281), <i>Rhagoletis zephyria</i> (LOC108377626), <i>Parasteatoda tepidariorum</i> (LOC107444616, LOC107450900)                            |
| probable carboxypeptidase, type IV secretion system, conjugal transfer protein TrbL, lysyl-tRNA synthetase, UDP-N-acetylmuramoylalanine-D-glutamate ligase | scaffold707:1-38814             | 38813           | scaffold707:35826-36154                          | Mariner Mos1 transposase (Ant origin) | Partial (few gene region) | <i>Vollenhovia emeryi</i> (NW_011966954.1,NW_011966496 ), <i>Wasmannia auropunctata</i> (scf7180000735528), <i>Brugia pahangi</i> (BPAG_contig0000608, BPAG_scaffold0000225)                                                                                 |
| DNA methylase, Ankyrin repeat domain protein, regulatory protein RepA, site-specific recombinase, cytochrome b-like                                        | scaffold741:1-47265             | 47264           | scaffold741:54020-54482, scaffold741:52587-52910 | IS110 family transposase, Integrase   | Partial (few gene region) | <i>Vollenhovia emeryi</i> (LOC105557561,NW_011966954.1,NW_011967060.1,NW_011967015.1 ), <i>Wasmannia auropunctata</i> (LOC105460331 , scf7180000733651), <i>Drosophila ananassae</i> (WD_0580 gene)                                                          |
